# Supplementary material
Source: PubMed Central journal article supplement (PMC6517069)
Supplement: NIHMS1014007-supplement-1.pdf [file NIHMS1014007-supplement-1.pdf]

1 **Supplementary Information**

2  
3 **Predictable and precise template-free CRISPR editing of pathogenic variants**

4 Max W. Shen<sup>‡1,2</sup>, Mandana Arbab<sup>‡3,4,5</sup>, Jonathan Hsu<sup>6,7</sup>, Daniel Worstell<sup>8</sup>, Olga  
5 Krabbe<sup>8,9</sup>, Christopher A. Cassa<sup>8,10</sup>, David R. Liu<sup>3,4,5\*</sup>, David K. Gifford<sup>2,6,10,11\*</sup> and  
6 Richard I. Sherwood<sup>8,9\*</sup>

7  
8 ‡ *These authors contributed equally to this work.*

9 <sup>1</sup> *Computational and Systems Biology Program, Massachusetts Institute of Technology,*  
10 *Cambridge, Massachusetts, USA.*

11 <sup>2</sup> *Computer Science and Artificial Intelligence Laboratory, Massachusetts Institute of*  
12 *Technology, Cambridge, Massachusetts, USA.*

13 <sup>3</sup> *Merkin Institute of Transformative Technologies in Healthcare, Broad Institute of*  
14 *Harvard and MIT, Cambridge, Massachusetts, USA.*

15 <sup>4</sup> *Department of Chemistry and Chemical Biology, Harvard University, Cambridge,*  
16 *Massachusetts 02138, USA.*

17 <sup>5</sup> *Howard Hughes Medical Institute, Harvard University, Cambridge, Massachusetts*  
18 *02138, USA.*

19 <sup>6</sup> *Department of Biological Engineering, Massachusetts Institute of Technology,*  
20 *Cambridge, Massachusetts, USA.*

21 <sup>7</sup> *Molecular Pathology Unit, Center for Cancer Research, and Center for Computational*  
22 *and Integrative Biology, Massachusetts General Hospital, Charlestown, Massachusetts,*  
23 *USA.*

24 <sup>8</sup> *Division of Genetics, Department of Medicine, Brigham and Women's Hospital and*  
25 *Harvard Medical School, Cambridge, Massachusetts, USA.*

26 <sup>9</sup> *Hubrecht Institute, Utrecht, the Netherlands.*

27 <sup>10</sup> *Broad Institute of MIT and Harvard, Cambridge, Massachusetts, USA.*

28 <sup>11</sup> *Department of Electrical Engineering and Computer Science, Massachusetts Institute*  
29 *of Technology, Cambridge, Massachusetts, USA.*

30  
31 \* Correspondence should be addressed to R.I.S. ([rsherwood@rics.bwh.harvard.edu](mailto:rsherwood@rics.bwh.harvard.edu)) or  
32 D.K.G. ([gifford@mit.edu](mailto:gifford@mit.edu)) or D.R.L. ([drliu@fas.harvard.edu](mailto:drliu@fas.harvard.edu)).  
33  
34

## Table of Contents

|    |                                            |           |
|----|--------------------------------------------|-----------|
| 35 |                                            |           |
| 36 |                                            |           |
| 37 | <b>Supplementary Discussion.....</b>       | <b>3</b>  |
| 38 |                                            |           |
| 39 | <b>Supplementary Methods.....</b>          | <b>12</b> |
| 40 |                                            |           |
| 41 | <b>- Plasmid and Insert Sequences.....</b> | <b>33</b> |
| 42 |                                            |           |
| 43 | <b>Supplementary References.....</b>       | <b>47</b> |
| 44 |                                            |           |
| 45 |                                            |           |
| 46 |                                            |           |
| 47 |                                            |           |

## 48 **Supplementary Discussion**

49

### 50 **Cellular repair of double-stranded DNA breaks and inDelphi**

51 DNA double-strand breaks are detrimental to genomic stability, and as such the detection  
52 and faithful repair of genomic lesions is crucial to cellular integrity. A large number of  
53 genes have evolved to respond to and repair DNA double-strand breaks, and these genes  
54 can be broadly grouped into a set of DNA repair pathways<sup>1</sup>, each of which differs in the  
55 biochemical steps it takes to repair DNA double-strand breaks. Accordingly, these  
56 pathways tend to produce characteristically distinguishable non-wildtype genotypic  
57 outcomes.

58

59 The goal of our machine learning algorithm, inDelphi, is to accurately predict the identities  
60 and relative frequencies of non-wildtype genotypic outcomes produced following a  
61 CRISPR/Cas9-mediated DNA double-strand break. To accomplish this goal, we  
62 developed parameters to classify three distinct categories of genotypic outcomes,  
63 microhomology deletions, microhomology-less deletions, and insertions, informed by the  
64 biochemical mechanisms underlying the DNA repair pathways that typically give rise to  
65 them.

66

67 Double strand breaks are thought to be repaired via four major pathways: classical non-  
68 homologous end-joining (c-NHEJ), alternative-NHEJ (alt-NHEJ), microhomology-  
69 mediated end-joining (MMEJ), and homology-directed repair (HDR)<sup>1</sup>. To create inDelphi,  
70 we developed three machine learning modules to model genotypic outcomes assuming  
71 characteristic of the c-NHEJ, microhomology mediated alt-NHEJ, and MMEJ pathways.  
72 While template-free CRISPR/Cas9 DNA double-strand break may lead to HDR repair via  
73 endogenous homology templates that exist in *trans*<sup>2</sup>, we do not explicitly model HDR-  
74 characteristic outcomes using our algorithm.

75

76 Before proceeding, it is important to note that while specific DNA repair pathways are  
77 characteristically associated with distinct genotypic outcomes, the proteins involved in the  
78 various pathways and the resulting repair products may at times overlap. This fact has  
79 several implications. First, we cannot make conclusive statements about the role of  
80 specific proteins or pathways in specific genotypic outcomes without perturbation  
81 experiments (e.g. our comparison of wildtype and *Prkdc*<sup>-/-</sup>*Lig4*<sup>-/-</sup> mESCs can illuminate the  
82 roles of these proteins, specifically). Second, because assigning genotypic outcomes to  
83 biochemical mechanisms is likely imperfect, we use machine learning methods to identify  
84 trends and patterns in genotype frequencies that refine this crude binning process.

85

86 In the first step of the inDelphi method, we separate genotypic outcomes into three  
87 classes: microhomology deletions (MH deletions), microhomology-less deletions (MH-  
88 less deletions), and single-base insertions (1-bp insertions) (Figure 1e). Below we outline  
89 the algorithmic definitions of each genotypic outcome class, the pathways associated with  
90 each class, and the DNA sequence parameters included in inDelphi training of each class.  
91 For more detailed technical algorithmic definitions of the genotypic outcome classes, see  
92 Supplementary Methods.

93

94 **MH deletions are predicted from MH length, MH GC content, and deletion length**

95 The majority of Cas9-mediated double-strand break repair genotypes we observe in our  
96 datasets are what we classify as MH deletions (53-58% in mESC, K562, HCT116, and  
97 HEK293). We hypothesize that these deletions occur through MMEJ-like processes and  
98 use known features of this pathways to inform a machine learning module to predict MH  
99 deletion outcomes. Following 5'-end resection as occurs in MMEJ, alt-NHEJ, and HDR<sup>1</sup>,  
100 microhomologous basepairing of single-stranded DNA (ssDNA) sequences occurs  
101 across the border of the double strand breakpoint<sup>3,4</sup>. To restore a contiguous double-  
102 strand DNA chain, the 5'-overhangs not participating in the microhomology are removed  
103 up until the paired microhomology region, and the unpaired ssDNA sequences are  
104 extended by DNA polymerase using the opposing strand as a template (Figure 1d,  
105 Extended Data Fig. 2).

106  
107 Assuming these same processes, inDelphi calculates the set of all MH deletions available  
108 given a specific sequence context and cleavage site.

109  
110 As an example workflow, given the following sequence and its cleavage site:

111  
112 ACGTG | CATGA  
113 TGCAC | GTACT

114  
115 for every possible deletion length from 1-bp to 60-bp deletions, we overlap the 3'-  
116 overhang downstream of the cut site under the upstream 3'-overhang and determine if  
117 there is any microhomologous basepairing. As an example, given the 4-bp deletion  
118 length:

119  
120 ACGTG  
121 | | |  
122 GTACT

123  
124 we see that there are three microhomologous basepairing events.

125  
126 We then choose a particular microhomology (here, the highlighted C:G):

127  
128 **AC**GTG  
129 | | |  
130 **G**TACT

131  
132 then generate its unique repair genotype by following left-to-right along the top strand and  
133 jumping down to the complement of the bottom strand to simulate DNA polymerase fill-  
134 in.

135  
136 Here, this yields:

137  
138 ACATGA  
139 TGTACT

140

141 This can also be displayed as an alignment. We note that by “jumping down” after the first  
142 base in the top strand, we can also describe this outcome using the delta-position 1. (See  
143 section on delta-positions). A deletion at delta-position 0 yields the same genotype.

144  
145 Deletion a: AC----ATGA  
146 Wt: ACGTGCATGA

147  
148 This same sequence context and cleavage site could produce a distinct 4-bp MH deletion  
149 genotypic outcome through use of the TG:AC microhomology. This single outcome can  
150 be described as using delta-positions 2, 3, or 4. inDelphi uses only the single maximum  
151 delta-position (here, 4) to described a unique MH deletion.

152  
153 Deletion b: ACGTG----A  
154 Wt: ACGTGCATGA

155  
156 Thus, there may be multiple MH deletion outcome genotypes for a given deletion length,  
157 and there is always a 1:1 mapping between the microhomologous basepairing used in  
158 that MH deletion and the resultant genotypic outcome. The set of MH deletions thus  
159 includes all 1-bp to 60-bp deletions that can be derived from the steps above that simulate  
160 the MMEJ mechanism.

161  
162 MMEJ efficiency has been reported to depend on the thermodynamic favorability and  
163 stability of a candidate microhomology<sup>3,4</sup>. To parameterize MH deletions using the  
164 biochemical sequence features that influence this form of DNA repair, inDelphi calculates  
165 the MH length, MH GC content, and resulting deletion length for each possible MH  
166 deletion. These features are input into a machine learning module referred to in the  
167 Supplementary Methods as the microhomology neural network (MH-NN) to learn the  
168 relationship between these features and the frequency of an MH deletion outcome in a  
169 training CRISPR/Cas9 genotypic outcome dataset. While we predict and empirically find  
170 that favored MH deletions have long MH lengths relative to total deletion length and high  
171 MH GC-contents, we do not provide any explicit direction or comparative weighting to  
172 these parameters at the outset. inDelphi then outputs a phi-score for any MH deletion  
173 genotype (whether it was in the training data or not) that represents the favorability of that  
174 outcome as predicted by MH-NN.

175  
176 It is important to emphasize that the phi-score of a particular MH deletion does not itself  
177 represent the likelihood of that MH deletion occurring in the context of all MH deletions at  
178 a given site. Some CRISPR/Cas9 target sites may have many possible favorable MH  
179 deletion outcomes while other sites have few, and thus phi-score must be normalized for  
180 a given target site to generate the fractional likelihood of that genotypic outcome at that  
181 site. Total unnormalized MH deletion phi-score is one factor that is further used to predict  
182 the relative frequency of the different repair classes: MH deletions, MH-less deletions,  
183 and insertions.

184  
185

186 **MH-less deletions are predicted from their length**

187 We define MH-less deletions as all possible deletions that have not been accounted for  
188 by the workflow described above for MH deletions. Mechanistically, our data analysis  
189 suggests that MH deletions are associated with repair genotypes produced by c-NHEJ  
190 and microhomology-mediated alt-NHEJ pathways.

191  
192 Following a double-strand break, c-NHEJ-associated proteins rapidly bind the DNA  
193 strands flanking the double-strand DNA breakpoint and recruit ligases, exonucleases, and  
194 polymerases to process and re-anneal the breakpoint in the absence of 5'-end resection  
195 (Extended Data Fig. 2)<sup>1,5</sup>. Commonly, c-NHEJ repair is error-free; however, in the context  
196 of Cas9-mediated cutting, faithful repair leads to repeated cutting, thereby increasing the  
197 eventual likelihood of mutagenic repair. Erroneous c-NHEJ repair products are mainly  
198 thought to consist of small insertions or deletions or combinations thereof that most  
199 frequently occur in the direct vicinity of the DNA break point<sup>5-7</sup>. The resulting deletions,  
200 which we refer to as medial end-joining MH-less deletions, have often lost bases both  
201 upstream and downstream of the cleavage site.

202  
203 Microhomology-mediated alt-NHEJ is a distinct pathway that produces MH-less deletion  
204 products. In contrast to c-NHEJ, which is microhomology independent, this form of alt-  
205 NHEJ repair occurs following 5'-end resection and is mediated by microhomology in the  
206 sequence surrounding the double-strand break-point<sup>1</sup>. Microhomologous basepairing  
207 stabilizes the 3'-ssDNA overhangs following 5'-end resection, similarly to in MMEJ,  
208 allowing DNA ligases to join the break across one of the strands of this temporarily  
209 configured complex. The opposing un-annealed flap is then removed, and newly  
210 synthesized DNA templated off of the remaining strand is annealed to repair the lesion  
211 (Extended Data Fig. 2).

212  
213 While alt-NHEJ uses microhomology, the repair products it produces do not follow the  
214 predictable genotypic patterns induced by MMEJ and are thus grouped into MH-less  
215 deletion genotypes. MH deletions are a direct merger of both annealed strands, in which  
216 the outcome genotype switches from top to bottom strand at the exact end-point of a  
217 microhomology. In contrast, while alt-NHEJ employs microhomology in its repair  
218 mechanism, the deletion outcomes it generates comprise bases exclusively derived from  
219 either the top or bottom strand. Mechanistically, this occurs because ligation of a 3'-  
220 overhang to its downstream ligation partner results in removal of the entire opposing  
221 ssDNA overhang up until the point of ligation. This process prevents any deletion from  
222 occurring in the 3'-overhang strand that is first attached to the DNA backbone, while  
223 inducing loss of an indeterminate length of sequence on the opposing strand. The  
224 resulting deletion genotypes, which we refer to as unilateral end-joining MH-less  
225 deletions, do not retain information on the exact microhomology causal to their  
226 occurrence, and are thus also referred to as MH-less.

227  
228 Consequently, the various mechanisms that give rise to MH-less deletions are capable of  
229 generating a vast number of genotypic outcomes for any given deletion length. Having  
230 less information on the biochemical mechanisms that impact the relative frequency of

231 NHEJ deletion products, inDelphi models these deletions without assuming any particular  
232 mechanism.

233  
234 inDelphi detects MH-less deletions from training data as the set of all deletions that are  
235 not MH deletions and parameterizes them solely by the length of the resulting deletion.  
236 This is based on the simple assumption that c-NHEJ and alt-NHEJ processes are most  
237 likely to produce short deletions, supported by our empirical observation. As with MH  
238 deletions, this assumption is not explicitly coded into the inDelphi MH-less deletion  
239 prediction module, instead allowing it to be “learned” by a neural network called MHless-  
240 NN.

241  
242 MHless-NN optimizes a phi-score for a given MH-less deletion length, grounded in the  
243 frequency of MH-less deletion outcomes of that length observed in the training data. We  
244 observe that MHless-NN learns a near-exponential decaying phi-score for increasing  
245 deletion length, that reflects the sum total frequency of all MH-less deletion genotypes.  
246 The total unnormalized MH-less deletion phi-score for a given target and cut site is also  
247 employed to inform the relative frequency of different repair classes.

#### 248 249 **1-bp insertions are predicted from sequence context and deletion phi-scores**

250 Lastly, inDelphi predicts 1-bp insertions from both the broader sequence context and the  
251 immediate vicinity of the cleavage site. We empirically find that 1-bp insertions are far  
252 more common than longer insertions, so we focus on their prediction. It is classically  
253 assumed that short sequence insertions are the result of c-NHEJ<sup>6,7</sup>, however, little else is  
254 known about their biochemical mechanism as it pertains to local sequence context to help  
255 inform prediction. Nonetheless, we find powerful correlations between the identities of the  
256 bases surrounding the Cas9 cleavage site and the frequency and identity of the inserted  
257 base (see main text). Motivated by these empirical observations, inDelphi is fed with  
258 training data on 1-bp insertion frequencies and identities at each training site  
259 parameterized with the identities of the -3, -4, and -5 bases upstream of the NGG PAM-  
260 sequence (when the training set is sufficiently large, and the -4 base alone when training  
261 data is limited) as features. Also added as features are the precision score of the deletion  
262 length distribution and the total deletion phi-score at that site. These features are  
263 combined into a *k*-nearest neighbor algorithm that predicts the relative frequencies and  
264 identities of 1-bp insertion products at any target site.

#### 265 266 **The combination of the MH, MH-less, and insertion model predict genotype** 267 **fractions**

268 Altogether, informed by known paradigms of DNA repair, we build 2 neural networks and  
269 a *k*-nearest neighbor model to predict genotypic outcomes following Cas9 cutting. These  
270 models compete and collaborate in inDelphi to generate predictions of the relative  
271 frequencies of these products. This competition within inDelphi among repair types  
272 reflects empirical evidence from Lib-A and Lib-B that sequence contexts do influence  
273 classes of repair outcomes. Sequence contexts with high phi scores (high  
274 microhomology) have higher efficiencies of MH deletions among all editing outcomes  
275 (Figure 2d, Extended Data Fig. 3), and sequence contexts with low phi scores (low  
276 microhomology) have higher efficiencies of 1-bp insertions among all editing outcomes

277 (Figure 2d, Extended Data Fig. 3). While it is tempting to generalize that the competition  
278 and collaboration among outcome classes modeled by inDelphi reflects interactions  
279 among components of distinct DNA repair pathways, the classes of outcomes considered  
280 by inDelphi do not necessarily arise from distinct DNA repair pathways as they are  
281 described above. inDelphi is trained on the repair outcomes only and cannot distinguish  
282 between the nature of genotypes when they may occur through MH-mediated and MH-  
283 less mechanisms, and it is imaginable that some repair products result through more than  
284 one repair pathway.

285  
286 As an additional note, while NHEJ is generally assumed to dominate double-strand break  
287 repair from environmentally induced damage<sup>5</sup>, we find in the context of Cas9 cutting that  
288 MH deletion genotypes are more common than MH-less deletions and insertions. It is  
289 possible that error-free c-NHEJ is occurring frequently in response to Cas9 cutting but  
290 that its perfect repair allows for recurring Cas9 cutting that goes undetected by our  
291 workflow, thus skewing the observed relative frequency profile of mutagenic outcomes  
292 toward MMEJ-type repair.

### 293 294 **Rarer CRISPR-Cas9 outcomes**

295 Our library assay and workflow involved data processing of high-throughput sequencing  
296 data using sequence alignments and a designed procedure for categorizing sequence  
297 alignments into categories of CRISPR-related outcomes. Beyond simple deletions and  
298 insertions, we identified other rarer outcomes that were explained as indels caused by  
299 CRISPR, such as combination insertion/deletions involving and/or near the cleavage site  
300 (0.5-2% of all products) and indels near but not immediately at the cleavage site (3-5% of  
301 all products), which occurred more often on the PAM-distal side of the double-strand  
302 break (data not shown). Our library assay is unable to observe events that occur outside  
303 of our high-throughput sequencing window.

304  
305 Default sequence alignment procedures can generate sequence alignments involving  
306 simple CRISPR-caused deletions and insertions that do not occur immediately at the  
307 cleavage site, but that can be transformed into an equal-scoring sequence alignment  
308 where the indel does occur immediately at the cleavage site. This straightforward  
309 processing step is not performed by the most common bioinformatic tools for sequence  
310 alignment, since they were not expressly designed for CRISPR. We note here that our  
311 sequence alignment procedure takes this into account (see Supplementary Methods for  
312 more detailed description). This attention to detail enables us to accurately identify simple  
313 indels that occur near but not immediately at the cleavage site. We observe that the  
314 frequency of these indels across target sites correlates significantly with the total on-target  
315 editing efficiency (measured by the frequency of non-wild-type outcomes out of all non-  
316 noise outcomes) at these target sites in HEK293 and mES cells. We also observe  
317 significantly higher frequencies in postCas9 treatment conditions than preCas9 control  
318 conditions. Together, these observations suggest that these indels are caused by  
319 CRISPR editing.

320  
321 ***Prkdc*<sup>-/-</sup>*Lig4*<sup>-/-</sup> mutants have distinct and predictable DNA repair product**  
322 **distributions**



323 While it is generally true that our work cannot establish roles for specific DNA repair  
324 pathways in specific types of Cas9-mediated outcomes, we have performed an  
325 experiment in which we measure Cas9-mediated genotypic outcomes from mESCs that  
326 are lacking *Prkdc* and *Lig4*, two proteins known to be key in c-NHEJ<sup>5</sup>. We find an increase  
327 in relative frequency of MH deletions as compared to MH-less deletions in *Prkdc*<sup>-/-</sup>*Lig4*  
328 <sup>-/-</sup> mESCs as compared to wild-type mESCs (see main text), which is suggestive of an  
329 increase in MMEJ outcomes at the expense of NHEJ outcomes.

330  
331 Intriguingly, we also find that *Prkdc*<sup>-/-</sup>*Lig4*<sup>-/-</sup> mESCs are impaired in unilateral deletions,  
332 where only bases from one side of the cutsite are removed, but not medial MH-less  
333 deletion outcomes that have loss of bases on both sides of the breakpoint. (Extended  
334 Data Fig. 6). As discussed earlier, microhomology-mediated alt-NHEJ, which we  
335 hypothesize may give rise to unilateral MH-less deletions, proceeds through a mechanism  
336 in which DNA repair intermediates that mimic MMEJ-mediated repair are formed initially  
337 (Extended Data Fig. 2), as microhomology base-pairing temporarily stabilizes 3'-  
338 overhangs following 5'-end resection. Subsequently, ligation joins one 3' overhang with  
339 the sequence on the other side of the DNA double-strand break, giving rise to a unilateral  
340 deletion. If the unilateral joining products we observe in our experiments indeed arise  
341 through similar mechanisms as those described by this form of alt-NHEJ, it is conceivable  
342 that the MMEJ pathway may overtake 3'-end ligation at this microhomology-containing  
343 intermediate step when ligation is impaired through loss of *Lig4*. Thus, cross-talk of  
344 microhomology-mediated repair pathways could account for loss of unilateral end-joining  
345 MH-less outcomes and concomitant increase in MH deletion outcomes. Medial joining  
346 outcomes are not hypothesized to originate from intermediates that overlap with  
347 microhomology-mediated deletion products (Extended Data Fig. 2). Therefore, the repair  
348 genotypes generated via this orthogonal pathway may be afforded more time to be  
349 completed by ligases other than *Lig4*, thus explaining why these outcomes appear  
350 unaffected by NHEJ impairment.

351  
352 While DNA repair products in *Prkdc*<sup>-/-</sup>*Lig4*<sup>-/-</sup> mESCs differ substantially from those in wild-  
353 type cells, we find that these DNA repair products are also highly predictable. In particular,  
354 inDelphi performed well on held-out *Prkdc*<sup>-/-</sup>*Lig4*<sup>-/-</sup> data when trained on *Prkdc*<sup>-/-</sup>*Lig4*<sup>-/-</sup> data  
355 (indel genotype prediction median Pearson correlation = 0.84, indel length frequency  
356 prediction Pearson correlation = 0.80), showing that our modeling approach is robustly  
357 capable of learning accurate predictions for Cas9 editing data in not just wild-type  
358 experimental settings but also settings with significant biochemical perturbation. As such,  
359 we suggest here that inDelphi's modeling approach can be useful on additional tasks  
360 unexplored here provided that inDelphi is supplied with appropriate training data.

361  
362 **NU7041, DPKi3, and MLN4924 induce a distinct DNA repair product distribution**

363 We further investigated the role of DNA repair pathways by three separate experiments  
364 involving HTS characterization of Lib-B in mESCs treated with three separate small  
365 molecules: NU7041, a DNA dependent protein kinase (DNA-PK) inhibitor; DPKi3, another  
366 DNA-PK inhibitor, and MLN4924, a NEDD8-activating enzyme (NAE) inhibitor. DNA-PK  
367 and NAE are proteins involved in c-NHEJ<sup>5,8</sup>.

368

369 MLN4924 is thought to inhibit the release of the Ku70/Ku80 heterodimer following proper  
370 c-NHEJ repair, potentially disrupting downstream processes such as transcription and  
371 replication, which may lead to decreased cell survival and a depletion of Ku70/Ku80-  
372 dependent DNA repair genotypes in a population.<sup>8</sup>

373  
374 DNA-PK is commonly recruited to DSBs during c-NHEJ and is known to phosphorylate *in*  
375 *vitro* many c-NHEJ-related factors including Ku70/80, XRCC4, DNA Ligase IV, Artemis,  
376 H2AX, p53, and itself. Inhibition of DNA-PK leads to DNA repair defects<sup>5</sup>. The catalytic  
377 subunit of DNA-PK is encoded by the *Prkdc* gene, which was knocked out in *Prkdc*<sup>-/-</sup>  
378 *Lig4*<sup>-/-</sup> cells.

379  
380 From HTS data, we observed that the frequency of MH deletions among all deletions  
381 clustered into three approximate groups: wild-type (median 77%) and MLN4924, then  
382 DPKi3 and NU7041 (median 81%), and lastly *Prkdc*<sup>-/-</sup>*Lig4*<sup>-/-</sup> (median 90%) (Extended Data  
383 Fig. 6). These data suggest that impairing DNA-PK (via DPKi3, NU7041 and *Prkdc*<sup>-/-</sup>)  
384 yields a moderate 17% reduction in the frequency of MH-less deletions (23% to 19%).  
385 This reduction appears to be non-redundant with knockout of *Lig4* evidenced in *Prkdc*<sup>-/-</sup>  
386 *Lig4*<sup>-/-</sup> cells with a 57% reduction (23% to 10%) in MH-less frequency. Lastly, impairing  
387 NAE did not have a significant impact on the frequency of MH-less deletions.

388  
389 We observed an overall increased frequency of repair to wild-type at pathogenic  
390 microduplication alleles after treatment with DPKi3, MLN4924, and NU7041 (Extended  
391 Data Fig. 6). Along with *Prkdc*<sup>-/-</sup>*Lig4*<sup>-/-</sup> cells, the change in repair efficiency was associated  
392 with deletion length ( $p < 2.2 \times 10^{-3}$ ), with decreased efficiency compared to wild-type at  
393 short deletion lengths and increased efficiency at longer deletion lengths.

394  
395 The change in repair efficiency caused by separate treatments of DPKi3, MLN4924, and  
396 NU7041 was highly consistent across different target sites ( $r = 0.73, 0.77, \text{ and } 0.81$ ,  
397 Extended Data Fig. 6). This is surprising since MLN4924 inhibits a different target than  
398 DPKi3 and NU7041. We observed a similar but weaker relationship between the three  
399 small molecules and *Prkdc*<sup>-/-</sup>*Lig4*<sup>-/-</sup>, with Pearson correlations of 0.09, 0.16, and 0.18.  
400 Taken together, these observations suggest a relationship between DNA sequence and  
401 the propensity of DNA repair outcomes through c-NHEJ.

402  
403 In DPKi3, MLN4924, and NU7041 treated cells, the decrease in MH-less deletions  
404 primarily occurs medial joining products (Extended Data Fig. 6), suggesting that DNA-PK  
405 is a strong contributor to medial joining products. However, when both DNA-PK and *Lig4*  
406 are knocked out in *Prkdc*<sup>-/-</sup>*Lig4*<sup>-/-</sup> cells, the average frequency of medial joining products  
407 is not significantly changed, and instead the primary decrease occurs in unilateral joining  
408 products.

409  
410 Interestingly, MLN4924 increases the average frequency of unilateral joining events.  
411 Combined with its effect of decreasing medial joining products, the overall net effect of  
412 MMLN4924 is an absence of significant change to the frequency of MH-less deletions.

413

414 The frequency distribution of medial joining products in *Prkdc<sup>-/-</sup>Lig4<sup>-/-</sup>* reveals a decrease  
415 in median frequency in combination with an inflation in high frequency outliers (target sites  
416 where >80% of all deletion products are MHless medial products) which skews the  
417 distribution's average to be above the median. Taken together, these data confirm that  
418 both medial and unilateral products are both generally depleted in *Prkdc<sup>-/-</sup>Lig4<sup>-/-</sup>* cells, and  
419 suggest that knocking out DNA-PK depletes medial MHless products while knocking out  
420 Lig4 depletes unilateral MHless products.  
421

422 **Supplementary Methods**

423

424 **Library cloning protocol**

425

426 **Synthesized oligo library sequence**

427 GATGGGTGCGACGCGTCAT [55bpTarget]AGATCGGAAGAGCACACGTCTG**AATATT**GTGGA  
428 AAGGACGAAACACCG [19/20-nt PROTOSPACER depending on whether it  
429 naturally starts with a G]GTTTAAGAGCTATGCTGGAAACAGC

430

431 Linker region / Oligo library amplification primer anneal region

432 Read 2 sequencing primer stub

433 **Sspl restriction site**

434 U6-promoter stub

435 sgRNA-hairpin stub

436

437

438 **1. Oligo library QPCR to determine number of amplification cycles for Oligo**  
439 **Library PCR**

440 *Notes: Amplification of oligos with relatively low GC-content is less efficient than GC-rich*  
441 *sequences. We found NEBNext polymerase to be the least biased in amplification of our*  
442 *library. Increasing the elongation time to 1 min per cycle for all cloning and sequencing*  
443 *library prep PCRs eliminates GC-skewing of library sequences and reduces the rate of*  
444 *PCR-recombination.*

445

446 - Set up the following reaction:

447

|          |                           |
|----------|---------------------------|
| 0.4 ng   | Synthesized Oligo Library |
| 10 ul    | NEBNext 2x Master Mix     |
| 0.5 ul   | 20uM <b>OligoLib_Fw</b>   |
| 0.5 ul   | 20uM <b>OligoLib_Rv</b>   |
| 0.2 ul   | SybrGreen Dye (100x)      |
| to 20 ul | H <sub>2</sub> O          |

448

449 67°C annealing temperature

450

451 - Check 246bp amplicon size on 2.5% agarose gel.

452 - Determine the point that signal amplification has plateaued.

453

454 **2. Oligo Library PCR amplification**

455 - Set up the following reaction:

456

|           |                           |
|-----------|---------------------------|
| 4 ng      | Synthesized Oligo Library |
| 50 ul     | NEBNext 2x Master Mix     |
| 2.5 ul    | 20uM <b>OligoLib_Fw</b>   |
| 2.5 ul    | 20uM <b>OligoLib_Rv</b>   |
| to 100 ul | H <sub>2</sub> O          |

457  
458 67°C annealing temperature, 1 minute extension time.  
459 Cycle number is half the number of cycles needed to reach signal amplification plateau  
460 in the QPCR in step 1, reduced by 1 cycle to scale for DNA input.

461  
462 - PCR purify amplified sequence.

463  
464 **3. Donor template amplification**

465 - Set up the following reaction:

466

|           |                              |
|-----------|------------------------------|
| 5 ng      | spCas9 sgRNA plasmid (71485) |
| 50 ul     | NEBNext 2x Master Mix        |
| 2.5 ul    | 20uM <b>CircDonor_Fw</b>     |
| 2.5 ul    | 20uM <b>CircDonor_Rv</b>     |
| to 100 ul | H <sub>2</sub> O             |

467

468 62°C annealing temperature

469 20 cycles

470

471 - Gel purify 167bp band from 2.5% agarose gel.

472

473 **4. Circular assembly and restriction digest linearization**

474 *Note: We use a molar ratio of donor template to amplified oligo library of 3:1. An increase*  
475 *in amplified oligo library compounds cross-over within library members resulting in*  
476 *mismatch of protospacer and target sequences.*

477

478 - Set up the following reaction:

479

|          |                               |
|----------|-------------------------------|
| 429 ng   | Donor template                |
| 239 ng   | Amplified Oligo Library       |
| 30 ul    | Gibson Assembly 2x Master Mix |
| to 60 ul | H <sub>2</sub> O              |

480

481 50°C incubation for 1 hour.

482

483 - Exonuclease treatment

484

|       |                            |
|-------|----------------------------|
| 60 ul | Circular assembly reaction |
| 9 ul  | ATP (25mM)                 |
| 9 ul  | 10x Plasmid Safe Buffer    |
| 3 ul  | Plasmid Safe Nuclease      |
| 9 ul  | H <sub>2</sub> O           |

485

486 37°C incubation for 1 hour.

487

488 - PCR purify and elute in 50 ul.

489 - Digest to linearize library

490

|       |                     |
|-------|---------------------|
| 50 ul | Purified assemblies |
| 10 ul | 10x CutSmart Buffer |
| 3 ul  | Sspl-HF             |
| 37 ul | H <sub>2</sub> O    |

491

492 37°C incubation for ≥ 3 hours.

493 - Gel purify 273bp band from 2.5% agarose gel.

494

495 *Note: Band is sometimes fuzzy and poorly visible. If not clearly discernible, proceed with*  
496 *gel isolation between 200-300bp.*

497

498 **5. Linearized library QPCR to determine number of amplification cycles for PCR**  
499 **amplification**

500 - Set up the following reaction:

501

|          |                             |
|----------|-----------------------------|
| 0.5 %    | Purified linearized library |
| 10 ul    | NEBNext 2x Master Mix       |
| 0.5 ul   | 20uM <b>PlasmidIns_Fw</b>   |
| 0.5 ul   | 20uM <b>PlasmidIns_Rv</b>   |
| 0.2 ul   | SybrGreen Dye (100x)        |
| to 20 ul | H <sub>2</sub> O            |

502

503 65°C annealing temperature

504

505 - Determine the point that signal amplification has plateaued.

506

507 **6. Linearized Library PCR amplification**

508 - Set up the following reaction:

509

|           |                             |
|-----------|-----------------------------|
| 50 %      | Purified linearized library |
| 50 ul     | NEBNext 2x Master Mix       |
| 2.5 ul    | 20uM <b>PlasmidIns_Fw</b>   |
| 2.5 ul    | 20uM <b>PlasmidIns_Rv</b>   |
| to 100 ul | H <sub>2</sub> O            |

510

511 65°C annealing temperature, 1 minute extension time.

512 Cycle number is number of cycles needed to reach signal amplification plateau in the  
513 QPCR in step 5, reduced by 4 cycles to scale for increased DNA input.

514

515 - Gel purify 375bp band from 2.5% agarose gel.

516

517 **7. Vector backbone digest**

518 - Set up the following reaction:

519

|           |                              |
|-----------|------------------------------|
| 2 ug      | spCas9 sgRNA plasmid (71485) |
| 10 ul     | 10x Buffer 2.1               |
| 3 ul      | BbsI                         |
| 2 ul      | XbaI                         |
| to 100 ul | H <sub>2</sub> O             |

520  
521  
522  
523  
524  
525  
526  
527  
528

37°C incubation for ≥ 3 hours.

- Gel purify 5.9 kb band from 1% agarose gel.

## 8. Vector assembly and cleanup

*Note: Include a ligation with water for insert as a control.*

- Set up the following reaction:

|          |                               |
|----------|-------------------------------|
| 300 ng   | Digested vector backbone      |
| 42 ng    | Amplified Oligo Library       |
| 30 ul    | Gibson Assembly 2x Master Mix |
| to 60 ul | H <sub>2</sub> O              |

529  
530  
531  
532  
533

50°C incubation for 1 hour.

- Isopropanol precipitation

|         |                          |
|---------|--------------------------|
| 40 ul   | Vector assembly reaction |
| 0.4 ul  | GlycoBlue Coprecipitant  |
| 0.8 ul  | 50mM NaCl                |
| 38.8 ul | Isopropanol              |

534  
535  
536  
537  
538  
539  
540

- Vortex and incubate at room temperature for 15 minutes.
- Spin down at ≥15.000g for 15 minutes, and carefully remove supernatant.
- Wash pellet with 300ul 80% EtOH and repeat spin at ≥15.000g for 5 minutes.
- Carefully remove all liquid without disturbing pellet, and let air dry for 1-3 minutes.
- Dissolve dried pellet in 10 ul H<sub>2</sub>O at 55°C for 10 minutes.

## 9. Transformation

*Note: Electroporation competent cells give a higher transformation efficiency than chemically competent cells. We use NEB10beta electro-competent cells, however these can be substituted for other lines and transformed according to the manufacturer's instructions.*

546  
547  
548  
549  
550

*Note: We use DRM as recovery and culture medium to enhance yield. If substituting for a less rich medium such as LB, we recommend scaling up the culture volume to obtain similar plasmid DNA quantities.*

551 *Note: Antibiotic-free recovery time should be limited to 15 minutes to prevent shedding of*  
552 *transformed plasmids from replicating bacteria.*

553  
554 *Note: Also transform water ligation as control.*  
555

- 556 - Pre-warm 3.5mL recovery medium per electroporation reaction, at 37°C for 1 hour.
- 557 - Pre-warm LB-agar plates containing appropriate antibiotic.
- 558 - Per reaction, add 1 ul purified vector assembly to 25ul competent cells on ice.  
559 Perform 8 replicate reactions.
- 560 - Electroporate according to the manufacturer's instructions.
- 561 - Immediately add 100 ul pre-warmed recovery media per cuvette and pool all  
562 replicates into culture flask.
- 563 - Add 1 mL recovery media per replicate reaction to culture flask and shake at  
564 200rpm 37°C for 10 – 15 minutes.
- 565 - Plate a dilution series from 1:10<sup>4</sup> – 1:10<sup>6</sup> on LB-agar plates containing antibiotic  
566 and grow overnight at 37°C
- 567 - Add 2 mL media per replicate reaction and admix appropriate antibiotic.
- 568 - Grow overnight in shaking incubator at 200rpm 37°C  
569
- 570 - Assess transformation efficiency from serial dilution LB-agar plates. Expect ~10<sup>6</sup>  
571 clones.

572  
573 *The development of this cloning protocol was guided by work described in Videgal et al.*  
574 *2015.*  
575



576 **Sequence alignment and data processing**

577 For library data, each sequenced pair of gRNA fragment and target was associated with  
578 a set of designed sequence contexts  $G$  by finding the designed sequence contexts for all  
579 gRNAs whose beginning section perfectly matches the gRNA fragment (read 1 in general  
580 does not fully sequence the gRNA), and by using locality sensitive hashing (LSH) with 7-  
581 mers on the sequenced target to search for similar designed targets. An LSH score on 7-  
582 mers between a reference and a sequenced context reflects the number of shared 7-  
583 mers between the two. If the best reference candidate scored, through LSH, greater than  
584 5 higher than the best LSH score of the reference candidates obtained from the gRNA-  
585 fragment, the LSH candidate is also added to  $G$ . LSH was used due to extensive (~33%  
586 rate) PCR recombination between read1 and read2 which in sequenced data appears as  
587 mismatched read1 and read2 pairs. The sequenced target was aligned to each candidate  
588 in  $G$  and the alignment with the highest number of matches is kept. Sequence alignment  
589 was performed using the Needleman-Wunsch algorithm using the parameters: +1 match,  
590 -1 mismatch, -5 gap open, -0 gap extend. For library data, starting gaps cost 0. For all  
591 other data, starting and ending gaps cost 0. For VO data, sequence alignments were  
592 derived from SAM files from SRA.

593  
594 Alignments with low-accuracy or short matching sections flanked by long (10 bp+)  
595 insertions and deletions were filtered out as PCR recombination products (observed  
596 frequency of ~5%). These PCR recombination products are different than that occurring  
597 between read1 and read2; these occur strictly in read2. Alignments with low matching  
598 rates were removed. Deletions and insertions were shifted towards the expected  
599 cleavage site while preserving total alignment score. CRISPR-associated DNA repair  
600 events were defined as any alignment with deletions or insertions occurring within a 4 bp  
601 window centered at the expected cut site and any alignment with both deletions and  
602 insertions (combination indel) occurring with a 10 bp window centered at the expected  
603 cut site. All CRISPR-associated DNA repair events observed in control data had their  
604 frequencies subtracted from treatment data to a minimum of 0.

605  
606 We carried out replicate experiments for library data in each cell type. For each cell-type,  
607 each target site not fulfilling the following data quality criteria was filtered: in each  
608 replicate, data at this target site must have a total of at least 1,000 reads for all CRISPR  
609 editing outcomes at that target site (see section on “Calling CRISPR editing outcomes  
610 with high confidence” below for a discussion on the 1,000 reads threshold), and a Pearson  
611 correlation of at least 0.85 in the frequency of microhomology-based deletion events. The  
612 class of microhomology-based deletion events was used for this criterion since it is a  
613 major repair class with the highest average replicability across experiments.

614  
615 **Details on alignment processing**

616 All alignments with gaps were shifted as much as possible towards the cleavage site while  
617 preserving the overall alignment score. Then, the following criteria were used to  
618 categorize the alignments into noise, not-noise but not CRISPR-associated (for example,  
619 wildtype); as well as primary and secondary CRISPR activity. All data used in modeling  
620 and analysis derive solely from outcomes binned into primary CRISPR activity.

621

622 The following criteria was used to filter library alignments into “noise” categories.

623

624 Homopolymer: Entire read is homopolymer of a single nucleotide. Not considered a  
625 CRISPR repair product.

626 Has N: Read contains at least one N. Discarded as noise, not considered a CRISPR  
627 repair product.

628 PCR Recombination: Contains recombination alignment signature: (1) if a long indel (10  
629 bp+) followed by chance overlap followed by long indel (10 bp+) of the opposite type, e.g.,  
630 insertion-randommatch-deletion and deletion-randommatch-insertion. OR, if one of these  
631 two indels is 30 bp+, the other can be arbitrarily short. If either criteria is true, and if the  
632 chance overlap is length 5 or less, or any length with less than 80% match rate, then it  
633 satisfies the recombination signature. In addition, if both indels are 30 bp+, regardless of  
634 the middle match region, it satisfies the recombination signature. Finally, if randommatch  
635 is length 0, then indel is allowed to be any length. Not considered a CRISPR repair  
636 product.

637 Poor-Matches: 55bp designed sequence context has less than 5 bp representation (could  
638 occur from 50 bp+ deletions or severe recombination) or less than 80% match rate. Not  
639 considered a CRISPR repair product.

640 Cutsite-Not-Sequenced: The read does not contain the expected cleavage site.

641 Other: An alignment with multiple indels where at least one non-gap region has lower  
642 than an 80% match rate. Or generally, any alignment not matching any defined category  
643 above or below. In practice, can include near-homopolymers. Not considered a CRISPR  
644 repair product.

645

646 The following criteria was used to filter library alignments into “main” categories.

647 Wildtype: No indels in all of alignment. Not considered a CRISPR repair product.

648

649 Deletion: An alignment with only a single deletion event. Subdivided into:

650 Deletion - Not CRISPR: Single deletion occurs outside of 4 bp window centered around  
651 cleavage site. Not considered a CRISPR repair product.

652 Deletion - Not at cut: Single deletion occurring within 4 bp window centered around  
653 cleavage site, but not immediately at cleavage site. Considered a CRISPR repair product.

654 Deletion: Single deletion occurring immediately at cleavage site. Considered a CRISPR  
655 repair product.

656

657 Insertion: An alignment with only a single insertion event. Subdivided into:

658 Insertion - Not CRISPR: Single insertion occurs outside of 10 bp window around cleavage  
659 site. Not considered a CRISPR repair product.

660 Insertion - Not at cut: Single insertion occurring within 4 bp window centered around  
661 cleavage site, but not immediately at cleavage site. Considered a CRISPR repair product.

662 Insertion: Single insertion occurring immediately at cleavage site. Considered a CRISPR  
663 repair product.

664

665 Combination indel: An alignment with multiple indels where all non-gap regions have at  
666 least 80% match rate. Subdivided into:

667 Combination Indel: All indels are within a 10 bp window around the cleavage site.  
668 Considered a primary CRISPR repair product.  
669 Forgiven Combination Indel: At least two indels, but not all, are within a 10 bp window  
670 around the cleavage site. Considered a rarer secondary CRISPR repair product, ignored.  
671 Forgiven Single Indel: Exactly one indel is within a 10 bp window around the cleavage  
672 site. Considered a rarer secondary CRISPR repair product, ignored.  
673 Combination Indel - Not CRISPR: No indels are within a 10 bp window around the  
674 cleavage site. Not considered a CRISPR repair product.

675  
676 We note that deletion and insertion events, even those spanning many bases, are defined  
677 to occur at a single location between bases. As such, events occurring up to 5 bp away  
678 from the cleavage site are defined as events where there are five or fewer  
679 matched/mismatched alignment positions between the event and the cleavage site,  
680 irrespective of the number of gap dashes in the alignment.

681  
682 **Calling CRISPR editing outcomes with high confidence**  
683 Following the processing steps above, we performed the following further analysis and  
684 processing steps to call high-confidence CRISPR editing outcomes. These steps largely  
685 follow heuristics, and we believe that a thorough and unbiased methodological  
686 standardization in counting CRISPR editing outcomes will be valuable future work.

687  
688 DNA repair at Cas9-mediated double-strand breaks is known to result in a large diversity  
689 of outcomes, with indels of varying length and positions around the cleavage site. The  
690 frequencies of many of these editing outcomes, though enriched in Cas9-treatment data  
691 over control data, are rare (<0.5% of all edited products) and can be challenging to assign  
692 as a CRISPR editing outcome due to a lack of foundational biological or computational  
693 models on the exact mechanisms of DNA repair. In addition, rare outcomes can  
694 sometimes be attributed to sequencing errors.

695  
696 In this work, we focus on CRISPR editing outcomes that are enriched in treatment data  
697 over control data and agree with a relatively conservative and strict model of DNA repair,  
698 in order to ensure a high degree of confidence in the editing outcomes that we call. As a  
699 result, we underestimate the total number of unique CRISPR editing outcomes, though  
700 we believe this underestimation is not by an order of magnitude, though it may be by a  
701 factor of 2x or so.

702  
703 We define high-confidence CRISPR editing outcomes as bins of alignments categorized  
704 by the previously described pipeline into CRISPR-associated categories that have no  
705 mismatches. Each unique deletion genotype consistent with microhomology is treated as  
706 a single unique outcome, though we note that microhomology deletions may arise by  
707 noise or chance though we expect this to be a rare event. Each unique insertion genotype  
708 is also treated as a single unique outcome, and as with MH deletions, we note that some  
709 insertions may arise by noise or chance though we anticipate this to be rare. In sum, we  
710 likely overestimate by a slight amount the true number of unique microhomology deletion  
711 and insertion events.

712

713 All microhomology-less deletion genotypes are binned together for a particular deletion  
714 length, which almost always will bin together multiple unique MH-less deletion genotypes.  
715 However, the class of MH-less deletions, in general, has lower replicate consistency and  
716 higher stochasticity than MH deletions, and the space of all possible MH-less deletions is  
717 orders of magnitude larger than that of MH deletions. The class of MH-less deletions is  
718 also less frequent than MH deletions in all five human and mouse cell types we examined.  
719 In sum, we characterize MH-less deletions as comprising a large number of rare  
720 genotypes that lack high replicate consistency. As such, we conservatively count all  
721 binned MH-less deletions for a particular deletion length as a single unique outcome. In  
722 sum, we likely underestimate by a moderate amount the true number of unique  
723 microhomology-less deletion events.

724  
725 As MH-less deletions represents the larger space of possible unique genotypes, in total,  
726 we are likely underestimating the total number of unique outcomes in our procedure that  
727 calls unique outcomes with high confidence. We provide statistics on the total number of  
728 high-confidence unique outcomes in the manuscript and in Extended Data Fig. 1 and 5.

729  
730 Based on a computational simulation of subsampling the data, we empirically set 1,000  
731 reads per target site as a minimum quality threshold. The diversity of editing outcomes  
732 requires some minimum read count to consider the data as representative of editing  
733 outcomes at that target site. In Lib-A and Lib-B data in U2OS and mESCs, we empirically  
734 observe that 1,000 reads per target site lies above the “elbow” in the curve plotting the  
735 number of unique high-confidence outcomes and subsampled read count. We  
736 recommend this quality filtering methodology in general for future work studying CRISPR  
737 editing outcomes, and based on our data, empirically suggest that 1,000 reads per target  
738 site may be a useful guideline for future experimental design.

#### 739 740 **Controlling for cell-type specific 1-bp insertion frequencies when measuring** 741 **replicability of indel frequencies across cell-types**

742 All indels not belonging to “all major repair outcomes” were filtered out. To adjust the  
743 frequencies of all 1-bp insertion genotypes in a target site in two cell-types, the average  
744 of the total 1-bp insertion frequency among all major repair outcomes was calculated  
745 between the two cell-types, then frequencies of each 1-bp insertion genotype was  
746 adjusted proportionally such that the resulting total 1-bp insertion frequency in that is  
747 equal to the aforementioned average, and thereby equal to the adjusted 1-bp insertion  
748 frequency in the data from the other cell-type.

#### 749 750 **Selection of variants from disease databases**

751 Disease variants were selected from the NCBI ClinVar database (downloaded September  
752 9, 2017)<sup>9</sup> and the Human Gene Mutation Database (publicly available variant data from  
753 before 2014.3)<sup>10</sup> for computational screening and subsequent experimental correction.

754  
755 A total of 4,935 unique variants were selected from Clinvar submissions where the  
756 functional consequence is described as complete insertions, deletions, or duplications  
757 where the reference or alternate allele is of length less than or equal to 30 nucleotides.  
758 Variants were included where at least one submitting lab designated the clinical

759 significance as 'pathogenic' or 'likely pathogenic' and no submitting lab had designated  
760 the variant as 'benign' or 'likely benign', including variants with all disease associations.  
761 More complex indels and somatic variants were included. A total of 18,083 unique  
762 insertion variants were selected from HGMD which were between 2 to 30 nucleotides in  
763 length. Variants were included with any disease association with the HGMD classification  
764 of 'DM' or disease-causing mutation.

765  
766 SpCas9 gRNAs and their cleavage sites were enumerated for each disease allele. Using  
767 a previous version of inDelphi, genotype frequency and indel length distributions were  
768 predicted for each tuple of disease variant and unique cleavage site. Among each unique  
769 disease, the single best gRNA was identified as the gRNA inducing the highest predicted  
770 frequency of repair to wildtype genotype, and if this was impossible (due to, for example,  
771 a disease allele with 2+ bp deletion), then the single best gRNA was identified as the  
772 gRNA inducing the highest predicted frameshift repair rate. 1327 sequence contexts were  
773 designed in this manner for Lib-B. An additional 265 sequence contexts were designed  
774 by taking the 265 sequence contexts in any disease in decreasing order of predicted  
775 wildtype repair rate, starting with Clinvar, stopping at 45% wildtype repair rate, then  
776 continuing with HGMD. This yielded 1592 total sequences derived from Clinvar and  
777 HGMD.

778  
779

## 780 **Definition of Delta-Positions**

781 Using the MMEJ mechanism, deletion events can be predicted at single-base resolution.  
782 For computational convenience, we use the tuple (deletion length, delta-position) to  
783 construct a unique identifier for deletion genotypes. A delta-position associated with a  
784 deletion length N is an integer between 0 and N inclusive (Extended Data Fig. 2). In a  
785 sequence alignment, a delta-position describes the starting position of the deletion gap in  
786 the read with respect to the reference sequence relative to the cleavage site. For a  
787 deletion length N and a cleavage site at position C such that seq[:C] and seq[C:] yield the  
788 expected DSB products where the vector slicing operation vector[index1:index2] is  
789 inclusive on the first index and exclusive on the second index (python style), a delta-  
790 position of 0 corresponds to a deletion gap at seq[C-N+0 : C+0], and generally with a  
791 delta-position of D, the deletion gap occurs at seq[C-N+D : C+D]. Microhomologies can  
792 be described with multiple delta-positions. To uniquely identify microhomology-based  
793 deletion genotypes, the single maximum delta-position in the redundant set is used.  
794 Microhomology-less deletion genotypes are associated with only a single delta position  
795 and deletion length tuple; we use this as its unique identifier.

796  
797 Another way to define delta-positions can be motivated by the example workflow in the  
798 Supplementary Discussion on MH deletions describing how each microhomology is  
799 associated with a deletion genotype. In that workflow, the delta-position is the number of  
800 bases included on the top strand before “jumping down” to the bottom strand.

801  
802 MH-less medial end-joining products correspond to all MH-less genotypes with delta-  
803 position between 1 and N-1 where N is the deletion length. MH-less unilateral end-joining  
804 products correspond to MH-less genotypes with delta-position 0 or N. We note that a  
805 deletion genotype with delta position N does not immediately imply that it is a  
806 microhomology-less unilateral end-joining product since it may contain microhomology  
807 (it’s possible that delta-positions N-j, N-j+1, ..., N all correspond to the same MH deletion.)  
808

## 809 **Definition of Precision Score**

810 For a distribution X, where |X| indicates its cardinality (or length when represented as a  
811 vector):

$$812 \quad \text{PrecisionScore}(X) = 1 - \frac{-\sum_{i=1}^n P(x_i) \log(P(x_i))}{\log(|X|)}$$

813 This precision score ranges between zero (minimally precise, or highest entropy) to one  
814 (maximally precise, or lowest entropy).

## 815 816 **inDelphi Deletion Modeling: Neural network input and output**

817 inDelphi receives as input a sequence context and a cleavage site location, and outputs  
818 two objects: a frequency distribution on deletion genotypes, and a frequency distribution  
819 on deletion lengths.

820  
821 To model deletions, inDelphi trains two neural networks: MH-NN and MHless-NN. MH-  
822 NN receives as input a microhomology that is described by two features: microhomology  
823 length and GC fraction in the microhomology. Using these features, MH-NN outputs a

824 number (psi). MHless-NN receives as input the deletion length. Using this feature,  
825 MHless-NN outputs a number (psi).

826

827 A phi score is obtained from a psi score using:  $\text{phi}_i = \exp(\text{psi}_i - 0.25 * \text{deletion\_length})$ ,  
828 where 0.25 is a “redundant” hyperparameter that serves to increase training speed by  
829 helpful scaling. This relationship between psi and phi is differentiable and encodes the  
830 assumption that the frequency of an event exponentially increases with neural network  
831 output psi (which empirically appears to reflect MH strength) and exponentially decreases  
832 with its minimum necessary resection length (deletion length).

833

834 The architecture of the MH-NN and MHless-NN networks are *input-dimension* -> 16 -> 16  
835 -> 1 for a total of two hidden layers where all nodes are fully connected. Sigmoidal  
836 activations are used in all layers except the output layer. All neural network parameters  
837 are initialized with Gaussian noise centered around 0. No regularization or dropout was  
838 used.

839

#### 840 **inDelphi Deletion Modeling: Making predictions**

841 Given a sequence context and cleavage site, inDelphi enumerates all unique deletion  
842 genotypes as a tuple of its deletion length and its delta-position for deletion lengths from  
843 1 bp to 60 bp. For each microhomology enumerated, an MH-phi score is obtained using  
844 MH-NN. In addition, for each deletion length from 1 bp to 60 bp, an MHindep-phi score is  
845 obtained using MHless-NN.

846

847 inDelphi combines all MH-phi and MHindep-phi scores for a particular sequence context  
848 into two objects – a frequency distribution on deletion genotypes, and a frequency  
849 distribution on deletion lengths – which are both compared to observations for training.  
850 The model is designed to output two separate objects because both are of biological  
851 interest, and separate but intertwined modeling approaches are useful for generating  
852 both. By learning to generate both objects, inDelphi jointly learns about microhomology-  
853 based deletion repair and microhomology-less deletion repair.

854

855 To generate a frequency distribution on deletion genotypes, inDelphi assigns a score for  
856 each microhomology. Score assignment considers the concept of “full” microhomology  
857 and treats full and not full MHs differently.

858

859 A microhomology is “full” if the length of the microhomology is equal to its deletion length.  
860 The biological significance of full microhomologies is that there is only a single deletion  
861 genotype possible for the entire deletion length, while in general, a single deletion length  
862 is consistent with multiple genotypes. In addition, this single genotype can be generated  
863 through not just the MH-dependent MMEJ mechanism but also through MH-less end-  
864 joining, for example as mediated by Lig4. Therefore, we model full microhomologies as  
865 receiving contributions from both MH-containing and MH-less mechanisms by scoring full  
866 microhomologies as  $\text{MH-phi}[i] + \text{MHindep-phi}[j]$  for deletion length  $j$  and microhomology  
867 index  $i$ .

868

869 Microhomologies that are not “full” are assigned a score of  $\text{MH-phi}[i]$  for MH index  $i$ .

870  
871 Scores for all deletion genotypes assigned this way are normalized to sum to 1 to produce  
872 a predicted frequency distribution on deletion genotypes.

873  
874 To generate a frequency distribution on deletion lengths, inDelphi assigns a score for  
875 each deletion length. Score assignment integrates contributions from both MH-dependent  
876 and MH-independent mechanisms via the following procedure: For each deletion length  
877  $j$ , its score is assigned as MHindep- $\phi[j]$  plus the sum of MH- $\phi$  for each microhomology  
878 with that deletion length. Scores for all deletion lengths are normalized to sum to 1 to  
879 produce a frequency distribution.

880  
881 inDelphi trains its parameters using a single sequence context by producing both a  
882 predicted frequency distribution on deletion genotypes and deletion lengths and  
883 minimizing the negative of the sum of two values: the mean squared Pearson correlation  
884 for the deletion genotype frequency distribution at each target site in the training set plus  
885 the mean squared Pearson correlation for the deletion length frequency distribution at  
886 each target site in the training set. This represents a multitask learning framework.

887  
888 In practice, deletion genotype frequency distributions are formed from observations for  
889 deletion lengths 1-60, and deletion length frequency distributions are formed from  
890 observations for deletion lengths 1-28. Both neural networks are trained jointly and  
891 simultaneously on both tasks. inDelphi is trained with stochastic gradient descent with  
892 batched training sets. inDelphi is implemented in Python using the autograd library. We  
893 used a batch size of 200, an initial weight scaling factor of 0.10, an initial step size of 0.10,  
894 and an exponential decaying factor for the step size of 0.999 per step. We observed  
895 performance convergence within about 50 epochs.

### 896 897 **inDelphi Deletion Modeling: Multitask learning improves performance**

898 Over the course of developing our model, at an intermediate stage we considered a  
899 simpler model for predicting the frequencies of MH deletions. This model featurizes all  
900 sequence microhomologies at a target site using MH length and GC content and uses a  
901 2x16x16x1 neural network with sigmoidal activations except at the output layer to output  
902  $\psi$ . This  $\psi$  value is adjusted using  $\exp(\psi - 0.25 * \text{deletion length})$  to obtain  $\phi$  for a  
903 particular microhomology, which are normalized across all microhomologies to sum to 1  
904 to achieve a predicted distribution of frequencies. Altogether, this model is identical to the  
905 MH module used in inDelphi, with the notable difference of not including contributions of  
906 MH-less  $\phi$  at “full” microhomologies.

907  
908 This simple model, henceforth known as the baseline model, does not recognize the  
909 possibility that a MH genotype may arise from both MH and MH-independent repair  
910 pathways. We compared the performance of the baseline model to inDelphi’s MH module  
911 and observed a statistically significant relative improvement of 10% in model performance  
912 as measured on test set data ( $p \sim 0.02$ ). These measurements were performed using Lib-  
913 A target sites in mESCs.

914



915 We note that the multitask model used in inDelphi also jointly trains MHless-NN and, in  
916 addition to predicting MH deletion frequencies more accurately than the baseline, also  
917 provides strong performance on deletion length frequency prediction.  
918

919 Using random seed A, the baseline model mean Pearson  $r$  on held-out data was .905,  
920 while the multitask model mean Pearson  $r$  on the same held-out data was 0.913, for a  
921 8.5% relative improvement ( $p = 0.009$ , one-sided  $t$ -test). Using random seed B, the  
922 baseline model mean Pearson  $r$  on held-out data was .924, while the multitask model  
923 mean Pearson  $r$  on the same held-out data was 0.928, for a 5.3% relative improvement  
924 ( $p = 0.02$ , one-sided  $t$ -test). Using random seed C, the baseline model mean Pearson  $r$   
925 on held-out data was .912, while the multitask model mean Pearson  $r$  on the same held-  
926 out data was 0.917, for a 5.7% relative improvement ( $p = 0.03$ , one-sided  $t$ -test).  
927

### 928 **inDelphi Deletion Modeling: Summary and Revisiting Assumptions**

929 In summary, inDelphi trains MH-NN, which uses as input (microhomology length,  
930 microhomology GC content) to output a psi score which is translated into a phi score  
931 using deletion length. This phi score represents the “strength” of the microhomology  
932 corresponding to a particular MH deletion genotype. It also trains MHless-NN which uses  
933 as input (deletion length) to directly output a phi score representing the “total strength” of  
934 all MH-independent activity for a particular deletion length.  
935

936 While the model assumes that microhomology and microhomology-less repair can  
937 overlap in contributions to a single repair genotype, this assumption is made  
938 conservatively by assuming that their contributions overlap only when there is no  
939 alternative. Specifically, in the context of a deletion length with full microhomology, the  
940 model assumes that they must overlap, while in the context of a deletion length without  
941 full microhomology, inDelphi allows MHindep-phi to represent all MH-less repair  
942 genotypes and none of the MH-dependent repair genotypes which are represented solely  
943 using their MH-phi scores. This can be seen by noting that at a deletion length  $j$  without  
944 full microhomology, MH genotypes are scored using their MH-phi scores, while the length  
945  $j$  is scored by MHindep-phi $[j]$  plus the sum of MH-phi for each microhomology. Therefore,  
946 the subset of MH-less genotypes at this deletion length have a score MHindep-phi $[j]$ .  
947

948 When the subset of MH-less genotypes includes only one MH-less genotype, this single  
949 genotype’s score is equal to MHindep-phi $[j]$ . In general, multiple MH-less genotypes are  
950 possible, in which case the total score of all of the MH-less genotypes is equal to  
951 MHindep-phi $[j]$ .  
952

953 The relative frequency of MH deletions and MH-less deletions is learned implicitly by the  
954 balancing between the sum of all MH-phi and MHindep-phi. Since MHindep-phi does not  
955 vary by sequence context while MH-phi does, the model assumes that variation in the  
956 fraction of deletions that use MH can at least partially be explained by varying sequence  
957 microhomology as represented by MH-NN.  
958

### 959 **inDelphi Insertion Modeling**

960 Once inDelphi is trained on both deletion tasks, it predicts insertions from a sequence  
961 context and cleavage site by using the precision score of the predicted deletion length  
962 distribution and total deletion phi (from all MH-phi and MHindep-phi). inDelphi also uses  
963 one-hot-encoded binary vectors encoding nucleotides -4 and -3. In a training set, these  
964 features are collected and normalized to zero mean and unit variance, and the fraction of  
965 1-bp insertions over the sum counts of 1-bp insertions and all deletions are tabulated as  
966 the prediction goal. A  $k$ -nearest neighbor model is built using the training data. inDelphi  
967 uses the default parameter  $k = 5$ .

968  
969 On test data, the above procedure is used to predict the frequency of 1-bp insertions out  
970 of 1-bp insertions and all deletions for a particular sequence context. Once this frequency  
971 is predicted, it is used to make frequency predictions for each of the 4 possible insertion  
972 genotypes, which are predicted by deriving from the training set the average insertion  
973 frequency for each base given its local sequence context. When the training set is small,  
974 only the -4 nucleotide is used. When the training set is relatively large, nucleotides -5, -4,  
975 and -3 are used.

976  
977 To produce a frequency distribution on 1-bp insertions and 1-60 bp deletion genotypes,  
978 scores for all deletion genotypes and all 1-bp insertions are normalized to sum to 1. To  
979 produce a frequency distribution on indel lengths (+1 to -60), scores for all deletion lengths  
980 and 1-bp insertions are normalized to sum to 1.

#### 981 **inDelphi: Repair classes predicted at varying resolution**

982 inDelphi predicts MH-deletions and 1-bp insertions at single base resolution. Measuring  
983 performance on the task of genotype frequency prediction considers this subset of repair  
984 outcomes only (about 60-70% of all outcomes).

985  
986 inDelphi predicts MH-less deletions to the resolution of deletion length. That is, inDelphi  
987 predicts a single frequency corresponding to the sum total frequency of all unique MH-  
988 less deletion genotypes possible for a particular deletion length. This modeling choice  
989 was made because genotype frequency replicability among MH-less deletions is  
990 substantially lower than among MH deletions.

991  
992 Measuring performance on the task of indel length frequency considers MH deletions,  
993 MH-less deletions, and 1-bp insertions (90% of all outcomes).

994  
995 In practice, if end-users desire, they can extend inDelphi predictions to frequency  
996 predictions for specific MH-less deletion genotypes by noting that MH-less deletions are  
997 distributed uniformly between 0 delta-position genotypes, medial genotypes, and N delta-  
998 position genotypes.

#### 1000 **Comparison with a linear baseline model**

1001 We compared inDelphi to a baseline model with the same model structure but replacing  
1002 the deep neural networks with linear models. We compared using Lib-A mESC data.  
1003 While inDelphi achieves a mean held-out Pearson correlation of 0.851 on deletion  
1004 genotype frequency prediction and 0.837 on deletion length frequency prediction, the  
1005

1006 linear baseline model achieves a mean held-out Pearson correlation of 0.816 on deletion  
1007 genotype frequency prediction and 0.796 on deletion length frequency prediction. When  
1008 including the third model component for 1-bp insertion modeling and testing on genotype  
1009 frequency prediction for 1-bp insertions and all deletions, inDelphi achieves a median  
1010 held-out Pearson correlation of 0.937 and 0.910 on the task of indel length frequency  
1011 prediction. The linear baseline model achieves a median held-out Pearson correlation of  
1012 0.919 and 0.900 on the two tasks respectively.

1013  
1014 From these results, we can see that much of the model's power is derived from its  
1015 designed structure which is independent of the choice of linear or non-linear modeling.  
1016 While the baseline does not significantly cripple the model, the use of deep nonlinear  
1017 neural networks offers a substantial performance improvement (10-24%) above linear  
1018 modeling. In addition, the strong performance of the linear baseline model highlights that  
1019 the prediction task, given the model structure, is relatively straightforward. This suggests  
1020 that our model should be able to generalize well to unseen data.

1021  
1022 The deep neural network version of MH-NN learns that microhomology length is more  
1023 important than % GC (Extended Data Fig. 2). The linear version learns the same  
1024 concept, with a weight of 1.1585 for MH length and 0.332 for % GC.

1025  
1026 **Comparison with a baseline model lacking microhomology length as a feature**  
1027 Microhomology length is an important feature for MH-NN (Extended Data Fig. 2). We  
1028 trained a model that uses only % GC as input to MH-NN while keeping the rest of the  
1029 model structure identical. On held-out data at Lib-A target sites in mESCs, this baseline  
1030 model at convergence achieves to a mean Pearson correlation of 0.59 on the task of  
1031 predicting deletion genotype frequencies, and a mean Pearson correlation of 0.58 on  
1032 the task of predicting deletion length frequencies. Notably, a model at iteration 0 with  
1033 randomly initialized weights achieves mean Pearson correlations of 0.55 and 0.54 on  
1034 the two respective tasks on held-out data. This basal Pearson correlation is relatively  
1035 high due to the model structure, in particular, the exponential penalty on deletion length.  
1036 In sum, removing MH length as a feature severely impacts model performance,  
1037 restricting it to predictive performance not appreciably better than random chance.

1038  
1039 **inDelphi training and testing on data from varying cell-types**

1040 For predicting genotype and indel length frequencies in any particular cell-type  $C$  where  
1041 data  $D$  is available, we first trained inDelphi's deletion component on a subset of Lib-A  
1042 mESC data. Then, we apply  $k$ -fold cross-validation on  $D$  where  $D$  is iteratively split into  
1043 training and test datasets. For each cross-validation iteration, the training set is used to  
1044 train the insertion frequency model ( $k$ -nearest neighbors) and insertion genotype model  
1045 (matrix of observed probabilities of each inserted base given local sequence context,  
1046 which is just the -4 nucleotide when the training dataset is small, and -5, -4 and -3  
1047 nucleotides when the training dataset is large). For each cross-validation iteration,  
1048 predictions are made at each sequence context in the test set which are compared to  
1049 observations for each sequence context to yield a Pearson correlation. For any particular  
1050 sequence context, the median test-time Pearson correlation across all cross-validation  
1051 iterations is used as a single number summary of the overall performance of inDelphi. For

1052 all reported results, we used 100-fold cross-validation with 80%/20% training and testing  
1053 splits. Empirically, we observed small variance in test-time Pearson correlation,  
1054 highlighting the stability of inDelphi's modeling approach.

1055  
1056 **inDelphi testing on endogenous VO data**  
1057 On this task, the deletion component of inDelphi was trained on a subset of the Lib-A  
1058 mESC data. For each cell type in HCT116, K562, and HEK293T, all VO sequence  
1059 contexts (about 100) were randomly split into training and test datasets 100 times. During  
1060 each split, the training set was used for *k*-nearest neighbor modeling of 1-bp insertion  
1061 frequencies. Feature normalization to zero mean and unit variance was not performed.  
1062 The average frequency of each 1-bp insertion genotype was derived from the training set  
1063 as well. For each of the ~100 sequence contexts, the median test-time Pearson  
1064 correlation was used for plotting in Figure 3. Due to the small size of the training set, only  
1065 the -4 nucleotide was used for modeling both the insertion frequency and insertion  
1066 genotype frequencies.

1067  
1068 **inDelphi testing on library data**  
1069 On this task, the deletion component of inDelphi was trained on a subset of the Lib-A  
1070 mESC data. The remaining test set was used for measuring test-time prediction  
1071 performance on Lib-A. Nucleotides -5, -4, and -3 were used for the insertion genotype  
1072 model. For testing on Lib-B, Lib-B was split into training and test datasets in the same  
1073 manner as with VO data. Nucleotide -4 was used for the insertion genotype model. The  
1074 median test-time Pearson correlation is used as a single number summary of the overall  
1075 performance of inDelphi on any particular sequence context. For reporting predictive  
1076 results in Figure 4, sequence contexts with low replicability (less than 0.85 Pearson  
1077 correlation) in observed editing outcome frequencies were first removed.

1078  
1079 **inDelphi training and testing on *Prkdc<sup>-/-</sup>Lig4<sup>-/-</sup>* data**  
1080 inDelphi was trained on data from 946 Lib-A sequence contexts and tested on 168 held-  
1081 out Lib-A sequence contexts. Nucleotide -4 was used for insertion rate modeling, all other  
1082 modeling choices were standard as described above. On held-out data, this version of  
1083 inDelphi achieved a median Pearson correlation of 0.84 on predicting indel genotype  
1084 frequencies, and 0.80 on predicting indel length frequencies.

1085  
1086 **Training the online public version of inDelphi and its expected properties**  
1087 For general-use on arbitrary cell types, we trained a version of inDelphi using additional  
1088 data from diverse types of cells. Deletion modeling was trained using data from 2,464  
1089 sequence contexts from high-replicability Lib-A and Lib-B data (including clinical variants  
1090 and microduplications, fourbp, and longdup) in mES and data from VO sequence contexts  
1091 in HEK293 and K562. Insertion frequency modeling is implemented as above. Insertion  
1092 genotype modeling uses nucleotides -5, -4, and -3. The insertion frequency model and  
1093 insertion genotype model are trained on VO endogenous data in K562 and HEK293T,  
1094 Lib-A data in mESC, and Lib-B data (including clinical variants and microduplications,  
1095 fourbp, and longdup) in mESC and U2OS.

1096

1097 Though MHless-NN, as trained on library data, never receives information on deletion  
1098 lengths beyond 28, we allow it to generalize its learned function and make predictions on  
1099 deletion lengths up to 60 bp to match the supported range of MH-NN.

1100  
1101 inDelphi makes predictions on 1-bp insertions and 1-60-bp deletions, which we  
1102 empirically show to consist of higher than 90% of all Cas9 editing outcomes in data from  
1103 multiple human and mouse cell lines. Nevertheless, there is a subset of repair (about 8%  
1104 on average) that inDelphi does not attempt to predict. We suggest that end-users,  
1105 depending on what predictive quantities are of interest, take this into account when using  
1106 inDelphi. For example, if inDelphi predicts that 60% of 1-bp insertions and 1-60-bp  
1107 deletions at a disease allele correspond to repair to wildtype genotype, a quantity of  
1108 interest may be the rate of wildtype repair in all Cas9 editing outcomes (including the 8%  
1109 not predicted by inDelphi). In such a situation, this quantity can be calculated as  
1110  $(92\% * 60\%) = 55.2\%$ .

1111  
1112 By the design of 1872 sequence contexts in Lib-A, our training dataset has rich and  
1113 uniform representation across all quintiles of several major axes of variation including GC  
1114 content, precision, and number of bases participating in microhomology as measured  
1115 empirically in the human genome. This design strategy enables inDelphi to generalize  
1116 well to arbitrary sequence contexts from the human genome.

1117  
1118 These training data further include data in the outlier range of statistics of interest,  
1119 including extremely high and low precision repair distributions, and extremely weak and  
1120 strong microhomology (minimal microhomology and extensive microduplication  
1121 microhomology sequences). The availability of such sequences in our training data  
1122 enables inDelphi to generalize well to sequence contexts of clinical interest and sequence  
1123 contexts supporting unusually high frequencies of precision repair. In particular, by  
1124 training on more than 1000 examples of repair at clinical microduplications, inDelphi has  
1125 received strong preparation for accurate prediction on other clinical microduplications.

1126  
1127 By training on data from many cell-types, we enable inDelphi to make predictions that are  
1128 generally applicable to many human cell-types. We note that the HCT116 human colon  
1129 cancer cell line experiences a markedly higher frequency of single base insertions  
1130 compared to all other cell lines we studied, possibly due to the MLH1 deficiency of this  
1131 cell line leading to impaired DNA mismatch repair. For this reason, we excluded HCT116  
1132 data from our training dataset. For best results, we suggest end-users keep in mind that  
1133 repair class frequencies can be cell type-dependent, and this issue has not been well-  
1134 characterized thus far.

1135  
1136 We note that inDelphi's main error tendency is on the side of overestimating rather than  
1137 underestimating the precision of repair (Figure 4). In general, this tendency can be  
1138 explained by noting that inDelphi only considers sequence microhomology as a factor,  
1139 while it's plausible and likely in biological experimental settings that even sequence  
1140 contexts with very strong sequence microhomology may not yield precise results due to  
1141 noise factors that are not considered by inDelphi. For best results, we recommend end-  
1142 users take this tendency into account when using inDelphi predictions for further

1143 experiments. In particular, if gRNAs are designed by using a minimum precision  
1144 threshold, end-users should recognize that observed repair outcomes may have empirical  
1145 precision under this threshold. However, conversely, it is unlikely that a gRNA will have  
1146 precision higher than what inDelphi predicts.  
1147

### 1148 **Lib-A design**

1149 All designed sequence contexts were 55 bp in length with cutting between the 27<sup>th</sup> and  
1150 28<sup>th</sup> base.  
1151

1152 1872 sequence contexts were designed by empirically determining the distribution of four  
1153 statistics in sequence contexts from the human genome. These four statistics are GC  
1154 content, total sum of bases participating in microhomology for 3-27-bp deletions, Azimuth  
1155 predicted on-target efficiency score, and the statistical entropy of the predicted 3-27-bp  
1156 deletion length distribution from a previous version of inDelphi. For each of these  
1157 statistics, empirical quintiles were derived by calculating these statistics in a large number  
1158 of sequence contexts from the human genome. For the library, sequence contexts were  
1159 designed by randomly generated DNA that categorized into each combination of quintiles  
1160 across each of the four statistics. For example, a sequence context falling into the 1<sup>st</sup>  
1161 quintile in GC, 2<sup>nd</sup> quintile of total MH, 1<sup>st</sup> quintile of Azimuth score, and 5<sup>th</sup> quintile of  
1162 entropy, was found by random search. With four statistics and five bins each (due to  
1163 quintiles), there are  $5^4 = 625$  possible combinations. For each combination, we attempted  
1164 to design three sequence contexts for a total of 1875; 3 sequences could not be designed  
1165 (for a total of 1872) though each bin was filled. 90 sequence contexts were designed from  
1166 VO sequence contexts. Other sequence contexts were also designed for a total of 2000  
1167 sequence contexts in Lib-A. Lib-A sequence names, gRNAs, and sequence contexts are  
1168 listed in Supplementary Table 2.  
1169

### 1170 **Lib-B design**

1171 All designed sequence contexts were 55 bp in length with cutting between the 27<sup>th</sup> and  
1172 28<sup>th</sup> base.  
1173

1174 1592 sequence contexts were designed from Clinvar and HGMD (see section on  
1175 Selection of variants from disease databases). Some disease sequence contexts were  
1176 designed that such that the corrected wildtype or frameshift allele supports further cutting  
1177 by the original gRNA; data from such sequence contexts were ignored during analysis.  
1178 57 “longdup” sequence contexts were designed by repeating the following procedure  
1179 three times: for  $N = 7$  to 25, an N-mer was randomly generated, then duplicating and  
1180 surrounded by randomly generated sequences, while ensuring that SpCas9 NGG was  
1181 included and appropriately positioned for cutting between positions 27 and 28. 90  
1182 sequence contexts were designed from VO sequence contexts. 228 “fourbp” sequence  
1183 contexts were designed at 3 contexts with random sequences (with total phi score on  
1184 average lower than VO sequence contexts) while varying positions -5 to -2; for each of  
1185 the 3 “low-microhomology” contexts, 76 four bases were randomly designed while  
1186 ensuring representation from all possible 2 bp microhomology patterns including no  
1187 microhomology, one base of microhomology at either position, and full two bases of  
1188 microhomology. Other sequence contexts were also designed for a total of 2000

1189 sequence contexts in Lib-B. Lib-B sequence names, gRNAs, and sequence contexts are  
1190 listed in Supplementary Table 3.

1191

### 1192 **1bpInsDisLib design**

1193 12 sequence contexts were designed from Clinvar and HGMD. Pathogenic alleles were  
1194 selected for a high predicted frequency of correction to the wild-type genotype via a Cas9-  
1195 mediated 1-bp insertion. Sequence names, gRNAs, and sequence contexts are listed in  
1196 Supplementary Table 4.

1197

### 1198 **PHG design**

1199 18 sequence contexts were designed using inDelphi to select SpCas9 gRNAs targeting  
1200 the coding regions of genes including VEGFA, VEGFR2, PDCD1, APOB, CCR5, CD274,  
1201 CXCR4, PCSK9, and APOBEC3B, such that a frameshift would be induced with higher  
1202 frequency than typical SpCas9 gRNAs. Of these 18 frameshift designs, 10 were designed  
1203 to induce a single deletion genotype with high precision, and 8 were designed to induce  
1204 a single 1-bp insertion genotype with high precision. 6 sequence contexts were designed  
1205 using inDelphi from Clinvar and HGMD where pathogenic 1-bp insertion alleles were  
1206 selected based on a high predicted frequency of induction from Cas9 editing of the wild-  
1207 type allele. Sequence names, gRNAs, and sequence contexts are listed in  
1208 Supplementary Table 5.

1209

### 1210 **Generating a DNA motif for 1-bp insertion frequencies**

1211 Nucleotides from positions -7 to 0 were one-hot-encoded and used in ridge regression to  
1212 predict the observed frequency of 1-bp insertions out of all Cas9 editing events in 1996  
1213 sequence contexts from Lib-A mESC data. The data were split into training and testing  
1214 sets (80/20 split) 10,000 times to calculate a bootstrapped estimate of linear regression  
1215 weights and test-set predictive Pearson correlation. The median test-set Pearson  
1216 correlation was found to be 0.62. To generate a DNA motif, any features that included 0  
1217 within the bootstrapped weight range were excluded (probability that the weight is zero  $>$   
1218  $1e-4$ ). The average bootstrapped weight estimate was used as the “logo height” for all  
1219 remaining features. Each feature is independent; vertical stacking of features follows the  
1220 published tradition of DNA motifs.

1221

### 1222 **Predicting precision repair of genomic SpCas9 gRNAs**

1223 In this work, we determined the distributions of the most frequent deletion and  
1224 insertion outcomes among major editing outcomes at SpCas9 gRNAs targeting human  
1225 exons and introns as predicted by inDelphi trained on data from Lib-A target sites in  
1226 mESCs and U2OS cells separately (Fig. 3f, Extended Data Table 1). A combination of  
1227 computational constraint (the inability to make predictions at ~350 million target sites  
1228 comprising all SpCas9 gRNAs in the human genome), uncertainty in the exact predictions  
1229 of the model and a preference for avoiding overfitting our training data, and lack of  
1230 sufficient held-out data to verify our predictions and identify potential bias, motivated us  
1231 to smooth the exact predictions made by the model. We resampled each predicted value  
1232 from a Gaussian centered at the predicted value with a specified standard deviation. For  
1233 mESCs, we set the standard deviation as the predicted value divided by 4, up to a  
1234 maximum of 3% for insertions, while for deletions we used the predicted value divided by

1235 4 with a minimum of 6%. For U2OS cells, we set the standard deviation as the predicted  
1236 value divided by 4 for insertions, and the predicted value divided by 4 with a minimum of  
1237 6% for deletions. The scaling of standard deviation at higher predicted values reflects the  
1238 abundance of data and therefore higher relative confidence at lower predicted values.  
1239 The use of symmetrical noise reflects our prior belief that our predictions are equally likely  
1240 to underestimate and overestimate the true value.  
1241



1242  
1243  
1244  
1245  
1246  
1247  
1248  
1249  
1250  
1251  
1252  
1253  
1254  
1255  
1256  
1257  
1258  
1259  
1260  
1261  
1262  
1263  
1264  
1265  
1266  
1267  
1268  
1269  
1270  
1271  
1272  
1273  
1274  
1275  
1276  
1277  
1278  
1279  
1280  
1281  
1282

**Plasmid and insert sequences**

**P2T-CAG-MCS-P2A-GFP-PuroR complete plasmid sequence**

CCACCTAAATTGTAAGCGTTAATATTTTGTAAAATTCGCGTTAAATTTTTGTAAAT  
CAGCTCATTTTTTAACCAATAGGCCGAAATCGGCCAAAATCCCTTATAAATCAAAGA  
ATAGACCGAGATAGGGTTGAGTGTGTTCCAGTTTGAACAAGAGTCCACTATTAA  
AGAACGTGGACTCCAACGTCAAAGGGCGAAAAACCGTCTATCAGGGCGATGGCCC  
ACTACGTGAACCATCACCTAATCAAGTTTTTTGGGGTCGAGGTGCCGTAAAGCAC  
TAAATCGGAACCCTAAAGGGAGCCCCGATTTAGAGCTTGACGGGGAAAGCCGGC  
GAACGTGGCGAGAAAGGAAGGGAAGAAAGCGAAAGGAGCGGGCGCTAGGGCGC  
TGGCAAGTGTAGCGGTACGCTGCGCGTAACCACCACACCCGCCGCTTAATGC  
GCCGCTACAGGGCGCGTCCCATTCCGCTTCCAGGCTGCGCAACTGTTGGGAAGG  
GCGATCGGTGCGGGCCTCTTCGCTATTACGCCAGCTGGCGAAAGGGGGATGTGC  
TGCAAGGCGATTAAGTTGGGTAACGCCAGGGTTTTCCAGTCACGACGTTGTA  
CGACGGCCAGTGAGCGCGCGTAATACGACTCACTATAGGGCGAATTGGGTACCG  
GCATATGGTTCTTGACAGAGGTGTAAAAAGTACTCAAAAATTTTACTCAAGTGAAAG  
TACAAGTACTTAGGGAAAATTTTACTCAATTA  
AAAAGTAAAAGTATCTGGCTAGAATC  
TTACTTGAGTAAAAGTAAAAAAGTACTCCATTA  
AAAATTGTA  
CTTGAGTATTAAGGAA  
GTAAAAGTAAAAGCAAGAAAGATCGATCTCGAAGGATCTGGAGGCCACCATGGTG  
TCGATAACTTCGTATAGCATA  
CATTATACGAAGTTATCGTGCTCGACATTGATTATT  
GACTAGTTATTAATAGTAATCAATTACGGGGT  
CATTAGTTCATAGCCCATATATGGA  
GTTCCGCGTTACATAACTTACGGTAAATGGCCCGCCTGGCTGACCGCCCAACGAC  
CCCCGCCCATTGACGTCAATAATGACGTATGTTCCCATAGTAACGCCAATAGGGAC  
TTTCCATTGACGTCAATGGGTGGAGTATTTACGGTAAACTGCCCACTTGGCAGTAC  
ATCAAGTGTATCATATGCCAAGTACGCCCCCTATTGACGTCAATGACGGTAAATGG  
CCCGCCTGGCATTATGCCAGTACATGACCTTATGGGACTTTCCTACTTGGCAGTA  
CATCTACGTATTAGTCATCGCTATTACCATGGT  
CGAGGTGAGCCCCACGTTCTGCT  
TCACTCTCCCCATCTCCCCCCCCCTCCCCACCCCAATTTTGTATTTATTTATTTTTTA  
ATTATTTTGTGCAGCGATGGGGGCGGGGGGGGGGGGGGGGGGGCGCGCGCCAGGCG  
GGGCGGGGCGGGGCGAGGGGCGGGGCGGGGCGAGGCGGAGAGGTGCGGGCGG  
CAGCCAATCAGAGCGGCGCGCTCCGAAAGTTTCTTTTATGGCGAGGCGGGCGG  
GGCGGCGGCCCTATAAAAAGCGAAGCGCGCGGGCGGGGAGTCGCTGCGAC  
GCTGCCTTCGCCCGTGCCCCGCTCCGCGCGCCGCTCGCGCCGCCCGCCCCGG  
CTCTGACTGACCGCGTTACTCCACAGGTGAGCGGGCGGGACGGCCCTTCTCCTC  
CGGGCTGTAATTAGCGCTTGGTTTAATGACGGCTTGTTTCTTTTCTGTGGCTGCGT  
GAAAGCCTTGAGGGGCTCCGGGAGGGCCCTTTGTGCGGGGGGAGCGGGCTCGGG  
GGGTGCGTGCGTGTGTGTGCGTGGGGAGCGCCGCGTGCGGCTCCGCGCTGC  
CCGGCGGCTGTGAGCGCTGCGGGCGCGGGCGGGGCTTTGTGCGCTCCGCAGT  
GTGCGCGAGGGGAGCGCGGCCGGGGGGCGGTGCCCGCGGTGCGGGGGGGGCT

1283 GCGAGGGGAACAAAGGCTGCGTGCGGGGTGTGTGCGTGGGGGGGTGAGCAGGG  
1284 GGTGTGGGCGCGTTCGGTTCGGGCTGCAACCCCCCTGCACCCCCCTCCCCGAGTT  
1285 GCTGAGCACGGCCCCGGCTTCGGGTGCGGGGCTCCGTACGGGGCGTGGCGCGGG  
1286 GCTCGCCGTGCCGGGCGGGGGGTGGCGGCAGGTGGGGGTGCCGGGCGGGGCG  
1287 GGGCCGCCTCGGGCCGGGGAGGGCTCGGGGGAGGGGCGCGGGCGCCCCCGGA  
1288 GCGCCGGCGGCTGTTCGAGGCGCGGGCAGCCGCAGCCATTGCCTTTTATGGTAAT  
1289 CGTGCGAGAGGGCGCAGGGACTTCCTTTGTCCCAAATCTGTGCGGAGCCGAAATC  
1290 TGGGAGGCGCCGCCGCACCCCCCTCTAGCGGGCGCGGGGCGAAGCGGTGCGGCG  
1291 CCGGCAGGAAGGAAATGGGCGGGGAGGGCCTTCGTGCGTCCCGCGCCGCCGT  
1292 CCCCTTCTCCCTCTCCAGCCTCGGGGCTGTCCGCGGGGGGACGGCTGCCTTCGG  
1293 GGGGGACGGGGCAGGGCGGGGTTTCGGCTTCTGGCGTGTGACCGGGCGGCTCTAG  
1294 AGCCTCTGCTAACCATGTTTCATGCCTTCTTCTTTTTCTACAGCTCCTGGGCAACGT  
1295 GCTGGTTATTGTGCTGTCTCATCATTTTTGGCAAAGAATTCTCGAGCGGCCGCCAG  
1296 TGTGATGGATATCGGATCCGCTAGCGCTACTAACTTCAGCCTGCTGAAGCAGGCT  
1297 GGAGACGTGGAGGAGAACCCTGGACCTGGACCGGTCCGACCATGGTGAGCAAG  
1298 GGCGAGGAGCTGTTACCGGGGTGGTGCCCATCCTGGTTCGAGCTGGACGGCGAC  
1299 GTAAACGGCCACAAGTTCAGCGTGTCCGGCGAGGGCGAGGGCGATGCCACCTAC  
1300 GGCAAGCTGACCCTGAAGTTCATCTGCACCACCGGCAAGCTGCCCGTGCCCTGG  
1301 CCCACCCTCGTGACCACCCTGACCTACGGCGTGCAGTGCTTCAGCCGCTACCCCG  
1302 ACCACATGAAGCAGCAGACTTCTTCAAGTCCGCCATGCCCGAAGGCTACGTCCA  
1303 GGAGCGCACCATCTTCTTCAAGGACGACGGCAACTACAAGACCCGCGCCGAGGT  
1304 GAAGTTCGAGGGCGACACCCTGGTGAACCGCATCGAGCTGAAGGGCATCGACTT  
1305 CAAGGAGGACGGCAACATCCTGGGGCACAAGCTGGAGTACAACACTACAACAGCCAC  
1306 AACGTCTATATCATGGCCGACAAGCAGAAGAACGGCATCAAGGTGAACTTCAAGAT  
1307 CCGCCACAACATCGAGGACGGCAGCGTGCAGCTCGCCGACCACTACCAGCAGAA  
1308 CACCCCATCGGCGACGGCCCCGTGCTGCTGCCCGACAACCACTACCTGAGCAC  
1309 CCAGTCCGCCCTGAGCAAAGACCCCAACGAGAAGCGCGATCACATGGTCCTGCTG  
1310 GAGTTCGTGACCGCCGCCGGGATCACTCTCGGCATGGACGAGCTGTACAAGTAAA  
1311 GCGGCCGCCACCGCGGTGGAGCTCGAATTAATTCATCGATGATGATCCAGACATG  
1312 ATAAGATACATTGATGAGTTTGGACAAACCACAACACTAGAATGCAGTGAAAAAATG  
1313 CTTTATTTGTGAAATTTGTGATGCTATTGCTTTATTTGTAACCATTATAAGCTGCAAT  
1314 AAACAAGTTAACAACAACAATTGCATTCATTTTATGTTTCAGGTTTCAGGGGGAGGTG  
1315 TGGGAGGTTTTTTAAAGCAAGTAAACCTCTACAAATGTGGTATGGCTGATTATGAT  
1316 CCTCTAGAGTCGGTGGGCCTCGGGGGCGGGTGCGGGGTCCGGCGGGGCGCCCC  
1317 GGGTGGCTTCGGTTCGGAGCCATGGGGTTCGTGCGCTCCTTTTCGGTCCGGCGCTGC  
1318 GGGTCGTGGGGCGGGCGTTCAGGCACCGGGCTTTCGGGGTCATGCACCAGGTGCG  
1319 CGGTCTTCGGGCACCTCGACGTCCGGCGGTGACGGTGAAGCCGAGCCGCTCGTA  
1320 GAAGGGGAGGTTGCGGGGCGCGGAGGTCTCCAGGAAGGCGGGCACCCCGGCGC  
1321 GCTCGGCCGCCTCCACTCCGGGGAGCACGACGGCGCTGCCAGACCCTTGCCCT  
1322 GGTGGTCCGGGCGAGACGCCGACGGTGGCCAGGAACCACGCGGGGCTCCTTGGGC

1323 CGGTGCGGCGCCAGGAGGCCTTCCATCTGTTGCTGCGCGGCCAGCCGGGAACCG  
1324 CTCAACTCGGCCATGCGCGGGCCGATCTCGGCGAACACCGCCCCCGCTTCGACG  
1325 CTCTCCGGCGTGGTCCAGACCGCCACCGCGGGCGCCGTCGTCCGCGACCCACACC  
1326 TTGCCGATGTCGAGCCCAGCGCGCGTGAGGAAGAGTTCTTGCAGCTCGGTGACC  
1327 CGCTCGATGTGGCGGTCCGGGTCGACGGTGTGGCGCGTGGCGGGGTAGTCGGC  
1328 GAACGCGGGCGGGCAGGGGTGCGTACGGCCCCGGGGGACGTCGTCGCGGGGTGGCGA  
1329 GGCGCACCGTGGGCTTGTACTCGGTCATGGAAGGTCGTCTCCTTGTGAGGGGTCA  
1330 GGGGCGTGGGTCAGGGGATGGTGGCGGCACCGGTCGTGGCGGCCGACCTGCAG  
1331 GCATGCAAGCTTTTTGCAAAAGCCTAGGCCTCCAAAAAGCCTCCTCACTACTTCT  
1332 GGAATAGCTCAGAGGCCGAGGCGGCCTCGGCCTCTGCATAAATAAAAAAATTAG  
1333 TCAGCCATGGGGCGGAGAATGGGCGGAACTGGGCGGAGTTAGGGGCGGGATGG  
1334 GCGGAGTTAGGGGCGGGACTATGGTTGCTGACTAATTGAGATGCATGCTTTGCAT  
1335 ACTTCTGCCTGCTGGGGAGCCTGGGGACTTTCCACACCTGGTTGCTGACTAATTG  
1336 AGATGCATGCTTTGCATACTTCTGCCTGCTGGGGAGCCTGGGGACTTTCCACACC  
1337 CTAAGTGCACACATTCCACAGAATCAAGTGATCTCCAAAAATAAGTACTTTTTG  
1338 ACTGTAAATAAAATTGTAAGGAGTAAAAAGTACTTTTTTTTTCTAAAAAATGTAATTA  
1339 AGTAAAAGTAAAAGTATTGATTTTTAATTGTAAGTAAAAGTAAAATCCCCAAAA  
1340 ATAATACTTAAGTACAGTAATCAAGTAAAATTACTCAAGTACTTTACACCTCTGGTTC  
1341 TTGACCCCCTACCTTCAGCAAGCCCAGCAGATCCGAGCTCCAGCTTTTGTTCCTT  
1342 TAGTGAGGGTTAATTGCGCGCTTGCGGTAATCATGGTCATAGCTGTTTCCTGTGTG  
1343 AAATTGTTATCCGCTCACAATTCCACACAACATACGAGCCGGAAGCATAAAGTGTA  
1344 AAGCCTGGGGTGCCTAATGAGTGAGCTAACTCACATTAATTGCGTTGCGCTCACTG  
1345 CCCGCTTTCCAGTCGGGAAACCTGTGCGTCCAGCTGCATTAATGAATCGGCCAAC  
1346 GCGCGGGGAGAGGCGGTTTGCATTTGGGCGCTTTCCGCTTCTCGCTCACTGA  
1347 CTGCTGCGCTCGGTGCTTCCGCTGCGGGCAGCGGTATCAGCTCACTCAAAGGC  
1348 GGTAATACGGTTATCCACAGAATCAGGGGATAACGCAGGAAAGAACATGTGAGCA  
1349 AAAGGCCAGCAAAAGGCCAGGAACCGTAAAAAGGCCGCGTTGCTGGCGTTTTTCC  
1350 ATAGGCTCCGCCCCCTGACGAGCATCACAAAATCGACGCTCAAGTCAGAGGTG  
1351 GCGAAACCCGACAGGACTATAAAGATAACCAGGCGTTTCCCCCTGGAAGCTCCCTC  
1352 GTGCGCTCTCCTGTTCCGACCCTGCCGCTTACCGGATACCTGTCCGCCTTTCTCC  
1353 CTTCCGGGAAGCGTGGCGCTTTCTCATAGCTCACGCTGTAGGTATCTCAGTTCGGT  
1354 GTAGGTCGTTCCGCTCCAAGCTGGGCTGTGTGCACGAACCCCCCGTTCAGCCCGAC  
1355 CGCTGCGCCTTATCCGGTAACTATCGTCTTGAGTCCAACCCGGTAAGACACGACTT  
1356 ATCGCCACTGGCAGCAGCCACTGGTAACAGGATTAGCAGAGCGAGGTATGTAGGC  
1357 GGTGCTACAGAGTTCTTGAAGTGGTGGCCTAACTACGGCTACACTAGAAGGACAG  
1358 TATTTGGTATCTGCGCTCTGCTGAAGCCAGTTACCTTCGGAAAAAGAGTTGGTAGC  
1359 TCTTGATCCGGCAAACAAACCACCGCTGGTAGCGGTGGTTTTTTTTGTTTGCAAGCA  
1360 GCAGATTACGCGCAGAAAAAAGGATCTCAAGAAGATCCTTTGATCTTTTCTACGG  
1361 GGTCTGACGCTCAGTGGAACGAAAACCTCACGTTAAGGGATTTTGGTCATGAGATTA  
1362 TCAAAAAGGATCTTCACCTAGATCCTTTTAAATTAATAAATGAAGTTTTAAATCAATCT

1363 AAAGTATATATGAGTAAACTTGGTCTGACAGTTACCAATGCTTAATCAGTGAGGCAC  
1364 CTATCTCAGCGATCTGTCTATTTTCGTTTCATCCATAGTTGCCTGACTCCCCGTCGTGT  
1365 AGATAACTACGATACGGGAGGGCTTACCATCTGGCCCCAGTGCTGCAATGATACC  
1366 GCGAGACCCACGCTCACCGGCTCCAGATTTATCAGCAATAAACCAGCCAGCCGGA  
1367 AGGGCCGAGCGCAGAAGTGGTCCTGCAACTTTATCCGCCTCCATCCAGTCTATTA  
1368 ATTGTTGCCGGGAAGCTAGAGTAAGTAGTTCGCCAGTTAATAGTTTGGCAACGTT  
1369 GTTGCCATTGCTACAGGCATCGTGGTGTACGCTCGTCGTTTGGTATGGCTTCATT  
1370 CAGCTCCGGTTCCCAACGATCAAGGCGAGTTACATGATCCCCCATGTTGTGCAAAA  
1371 AAGCGGTTAGCTCCTTCGGTCCCTCCGATCGTTGTCAGAAGTAAGTTGGCCGCAGT  
1372 GTTATCACTCATGGTTATGGCAGCACTGCATAATTCTCTTACTGTCATGCCATCCGT  
1373 AAGATGCTTTTTCTGTGACTGGTGAGTACTCAACCAAGTCATTCTGAGAATAGTGTAT  
1374 GCGGCGACCGAGTTGCTCTTGCCCGGCGTCAATACGGGATAATACCGCGCCACAT  
1375 AGCAGAACTTTAAAAGTGCTCATCATTGGAAAACGTTCTTCGGGGCGAAAACCTC  
1376 AAGGATCTTACCGCTGTTGAGATCCAGTTCGATGTAACCCACTCGTGCACCCAACT  
1377 GATCTTCAGCATCTTTTACTTTACCAGCGTTTCTGGGTGAGCAAAAACAGGAAGG  
1378 CAAAATGCCGCAAAAAAGGGAATAAGGGCGACACGGAAATGTTGAATACTCATACT  
1379 CTTCTTTTTCAATATTATTGAAGCATTATCAGGGTTATTGTCTCATGAGCGGATAC  
1380 ATATTTGAATGTATTTAGAAAAATAAACAAATAGGGGTTCGCGGCACATTTCCCCGA  
1381 AAAGTG  
1382  
1383

1384 **LDLRwt**  
1385 ATGGGGCCCTGGGGCTGGAAATTGCGCTGGACCGTCGCCTTGCTCCTCGCCGCG  
1386 GCGGGGACTGCAGTGGGCGACAGATGCGAAAGAAACGAGTTCCAGTGCCAAGAC  
1387 GGGAAATGCATCTCCTACAAGTGGGTCTGCGATGGCAGCGCTGAGTGCCAGGATG  
1388 GCTCTGATGAGTCCCAGGAGACGTGCTTGTCTGTACCTGCAAATCCGGGGACTT  
1389 CAGCTGTGGGGGCCGTGTCAACCGCTGCATTCCTCAGTTCTGGAGGTGCGATGGC  
1390 CAAGTGGACTGCGACAACGGCTCAGACGAGCAAGGCTGTCCCCCAAGACGTGC  
1391 TCCCAGGACGAGTTTCGCTGCCACGATGGGAAGTGCATCTCTCGGCAGTTCGTCT  
1392 GTGACTCAGACCGGGACTGCTTGGACGGCTCAGACGAGGCCTCCTGCCCGGTGC  
1393 TCACCTGTGGTCCC GCCAGCTTCCAGTGCAACAGCTCCACCTGCATCCCCAGCT  
1394 GTGGGCCTGCGACAACGACCCCGACTGCGAAGATGGCTCGGATGAGTGGCCGCA  
1395 GCGCTGTAGGGGTCTTTACGTGTTCCAAGGGGACAGTAGCCCCTGCTCGGCCTTC  
1396 GAGTTCCACTGCCTAAGTGGCGAGTGCATCCACTCCAGCTGGCGCTGTGATGGTG  
1397 GCCCGACTGCAAGGACAAATCTGACGAGGAAAACACTGCGCTGTGGCCACCTGTGC  
1398 CCCTGACGAATTCCAGTGCTCTGATGGAAACTGCATCCATGGCAGCCGGCAGTGT  
1399 GACCGGGAATATGACTGCAAGGACATGAGCGATGAAGTTGGCTGCGTTAATGTGA  
1400 CACTCTGCGAGGGACCCAACAAGTTCAAGTGTACAGCGGGCGAATGCATCACCCT  
1401 GGACAAAGTCTGCAACATGGCTAGAGACTGCCGGGACTGGTCAGATGAACCCATC  
1402 AAAGAGTGCGGGACCAACGAATGCTTGGACAACAACGGCGGCTGTTCCCACGTCT  
1403 GCAATGACCTTAAGATCGGCTACGAGTGCCTGTGCCCGACGGCTTCCAGCTGGT  
1404 GGCCCAGCGAAGATGCGAAGATATCGATGAGTGTGAGGATCCCGACACCTGCAGC  
1405 CAGCTCTGCGTGAACCTGGAGGGTGGCTACAAGTGCCAGTGTGAGGAAGGCTTC  
1406 CAGCTGGACCCCCACACGAAGGCCTGCAAGGCTGTGGGCTCCATCGCCTACCTCT  
1407 TCTTCACCAACCGGCACGAGGTCAGGAAGATGACGCTGGACCGGAGCGAGTACA  
1408 CCAGCCTCATCCCCAACCTGAGGAACGTGGTCGCTCTGGACACGGAGGTGGCCA  
1409 GCAATAGAATCTACTGGTCTGACCTGTCCCAGAGAATGATCTGCAGCACCCAGCTT  
1410 GACAGAGCCCACGGCGTCTCTTCCTATGACACCGTCATCAGCAGAGACATCCAGG  
1411 CCCCCGACGGGCTGGCTGTGGACTGGATCCACAGCAACATCTACTGGACCGACTC  
1412 TGTCCTGGGCACTGTCTCTGTTGCGGATACCAAGGGCGTGAAGAGGAAAACGTTA  
1413 TTCAGGGAGAACGGCTCCAAGCCAAGGGCCATCGTGGTGGATCCTGTTTCATGGCT  
1414 TCATGTAAGTGGACTGACTGGGGAACCTCCCGCCAAGATCAAGAAAGGGGGCCTGAA  
1415 TGGTGTGGACATCTACTCGCTGGTACTGAAAACATTTCAGTGGCCCAATGGCATCA  
1416 CCCTAGATCTCCTCAGTGGCCGCCTCTACTGGGTTGACTCCAAACTTCACTCCATC  
1417 TCAAGCATCGATGTCAATGGGGGCAACCGGAAGACCATCTTGGAGGATGAAAAGA  
1418 GGCTGGCCCACCCCTTCTCCTTGGCCGTCTTTGAGGACAAAGTATTTTGGACAGAT  
1419 ATCATCAACGAAGCCATTTTCAGTGCCAACCGCCTCACAGGTTCCGATGTCAACTT  
1420 GTTGGCTGAAAACCTACTGTCCCCAGAGGATATGGTCCTCTTCCACAACCTCACCC  
1421 AGCCAAGAGGAGTGAACCTGGTGTGAGAGGACCACCCTGAGCAATGGCGGCTGCC  
1422 AGTATCTGTGCCTCCCTGCCCGCAGATCAACCCCACTCGCCCAAGTTTACCTG  
1423 CGCCTGCCCGGACGGCATGCTGCTGGCCAGGGACATGAGGAGCTGCCTCACAGA  
1424 GGCTGAGGCTGCAGTGGCCACCCAGGAGACATCCACCGTCAGGCTAAAGGTGAG

1425 CTCCACAGCCGTAAGGACACAGCACACAACCACCCGGCCTGTTCCCGACACCTCC  
1426 CGGCTGCCTGGGGCCACCCCTGGGCTCACCACGGTGGAGATAGTGACAATGTCT  
1427 CACCAAGCTCTGGGCGACGTTGCTGGCAGAGGAAATGAGAAGAAGCCCAGTAGC  
1428 GTGAGGGCTCTGTCCATTGTCTCCCCATCGTGCTCCTCGTCTTCTTTGCCTGGG  
1429 GGTCTTCTTCTATGGAAGAAGTGGCGGCTTAAGAACATCAACAGCATCAACTTTG  
1430 ACAACCCCGTCTATCAGAAGACCACAGAGGATGAGGTCCACATTTGCCACAACCA  
1431 GGACGGCTACAGCTACCCCTCGAGACAGATGGTCAGTCTGGAGGATGACGTGGC  
1432 G

1433

1434 **LDLRDup252 with surrounding region**

1435 CCCCCAAGACGTGCTCCCAGGACGAGTTTCGCTGCCACGATGGGAAGTGCATCTC  
1436 TCGGCAGTTCGTCTGTGACTCAGACCGGGACTGCTTGGACGGCTCAGACGAGGC  
1437 CTCCTGCCCGGTGCTCACCTGTGGTCCCGCCAGCTTCCAGTGCAACAGCTCCACC  
1438 TGCATCCCCCAGCTGTGGGCCTGCGACAACGACCCCGACTGCGAAGATGGCTCG  
1439 GAGGCTCGGATGAGTGGCCGCAGCGCTGTAGGGGTCTTTACGTGTTCCAAGGGG  
1440 ACAGTAGCCCCTGCTCGGCCTTCGAGTTCCACTGCCTAAGTGGCGAGTGCATCCA  
1441 CTCCAGCTGGCGCTGTGATGGTGGCCCCGACTGCAAGGACAAATCTGACGAGGA  
1442 AACTGCG

1443

1444 **LDLRDup254/255 with surrounding region**

1445 CCCCCAAGACGTGCTCCCAGGACGAGTTTCGCTGCCACGATGGGAAGTGCATCTC  
1446 TCGGCAGTTCGTCTGTGACTCAGACCGGGACTGCTTGGACGGCTCAGACGAGGC  
1447 CTCCTGCCCGGTGCTCACCTGTGGTCCCGCCAGCTTCCAGTGCAACAGCTCCACC  
1448 TGCATCCCCCAGCTGTGGGCCTGCGACAACGACCCCGACTGCGAAGATGGCTCG  
1449 GATGAGTGGCCGCAGCGCTGTAGGGGTCTTTACGTGTTCCAAGGGGACAGTAGC  
1450 CCCTGCTCGGCCTTCGAGTTCCACTGCCTAAGTGGCGAGTGCATCCACTCCAGCT  
1451 GGCGCTGTGATGGTGGCCCCGACTGCAAGGACAAATCTGACAGGACAAATCTGAC  
1452 GAGGAAAAGTGCAGCTGTGGCCACCTGTCGCCCTGACGAATTCCAGTGCTCTGATG  
1453 GAAACTGCATCCATG

1454

1455 **LDLRDup258 with surrounding region**

1456 CCCCCAAGACGTGCTCCCAGGACGAGTTTCGCTGCCACGATGGGAAGTGCATCTC  
1457 TCGGCAGTTCGTCTGTGACTCAGACCGGGACTGCTTGGACGGCTCAGACGAGGC  
1458 CTCCTGCCCGGTGCTCACCTGTGGTCCCGCCAGCTTCCAGTGCAACAGCTCCACC  
1459 TGCATCCCCCAGCTGTGGGCCTGCGACAACGACCCCGACTGCGAAGATGGCTCG  
1460 GATGAGTGGCCGCAGCGCTGTAGGGGTCTTTACGTGTTCCAAGGGGACAGTAGC  
1461 CCCTGCTCGGCCTTCGAGTTCCACTGCCTAAGTGGCGAGTGCATCCACTCCAGCT  
1462 GGCGCTGTGATGGTGGCCCCGACTGCAAGGACAAATCTGAGGACAAATCTGACGA  
1463 GGAAAAGTGCAGCTGTGGCCACCTGTCGCCCTGACGAATTCCAGTGCTCTGATGGA  
1464 AACTGCATCCATG

1465

1466 **LDLRDup261 with surrounding region**

1467 CCCCCAAGACGTGCTCCCAGGACGAGTTTCGCTGCCACGATGGGAAGTGCATCTC

1468 TCGGCAGTTCGTCTGTGACTCAGACCGGGACTGCTTGGACGGCTCAGACGAGGC

1469 CTCCTGCCCGGTGCTCACCTGTGGTCCCGCCAGCTTCCAGTGCAACAGCTCCACC

1470 TGCATCCCCCAGCTGTGGGCCTGCGACAACGACCCCGACTGCGAAGATGGCTCG

1471 GATGAGTGGCCGCAGCGCTGTAGGGGTCTTTACGTGTTCCAAGGGGACAGTAGC

1472 CCCTGCTCGGCCTTCGAGTTCCACTGCCTAAGTGGCGAGTGCATCCACTCCAGCT

1473 GGCGCTGTGATGGTGGCCCCGACTGCAAGGACAAATCTGACGACAAATCTGACGA

1474 GGAAAAGTGCCTGTGGCCACCTGTCGCCCTGACGAATTCCAGTGCTCTGATGGA

1475 AACTGCATCCATG

1476

1477 **LDLRDup264 with surrounding region**

1478 CTTTCATGTAAGTGGACTGACTGGGGAACTCCCGCCAAGATCAAGAAAGGGGGCCTG

1479 AATGGTGTGGACATCTACTCGCTGGTGGAGCTGGTGGACTGAAAACATTCAGTGGCC

1480 CAATGGCATCACCTAG

1481

1482

1483 **GAAwT**  
1484 ATGGGAGTGAGGCACCCGCCCTGCTCCCACCGGCTCCTGGCCGTCTGCGCCCTC  
1485 GTGTCCTTGGCAACCGCTGCACTCCTGGGGCACATCCTACTCCATGATTTCCCTGCT  
1486 GGTTCCCCGAGAGCTGAGTGGCTCCTCCCCAGTCCTGGAGGAGACTCACCCAGCT  
1487 CACCAGCAGGGAGCCAGCAGACCAGGGCCCCGGGATGCCCAGGCACACCCCGG  
1488 CCGTCCCAGAGCAGTGCCCACACAGTGCGACGTCCCCCCCCAACAGCCGCTTCGA  
1489 TTGCGCCCCTGACAAGGCCATCACCCAGGAACAGTGCGAGGCCCGCGGCTGTTG  
1490 CTACATCCCTGCAAAGCAGGGGCTGCAGGGAGCCCAGATGGGGCAGCCCTGGTG  
1491 CTTCTTCCCACCCAGCTACCCAGCTACAAGCTGGAGAACCTGAGCTCCTCTGAAA  
1492 TGGGCTACACGGCCACCCTGACCCGTACCACCCCCACCTTCTTCCCCAAGGACAT  
1493 CCTGACCCTGCGGCTGGACGTGATGATGGAGACTGAGAACCGCCTCCACTTCACG  
1494 ATCAAAGATCCAGCTAACAGGCGCTACGAGGTGCCCTTGGAGACCCCGCATGTCC  
1495 ACAGCCGGGCACCGTCCCCACTCTACAGCGTGGAGTTCTCCGAGGAGCCCTTCG  
1496 GGGTGATCGTGCGCCGGCAGCTGGACGGCCGCGTGCTGCTGAACACGACGGTG  
1497 GCGCCCCTGTTCTTTGCGGACCAGTTCCTTCAGCTGTCCACCTCGCTGCCCTCGC  
1498 AGTATATCACAGGCCTCGCCGAGCACCTCAGTCCCCTGATGCTCAGCACCAGCTG  
1499 GACCAGGATCACCTGTGGAACCGGGACCTTGCGCCACGCCCCGGTGCGAACCT  
1500 CTACGGGTCTCACCTTTCTACCTGGCGCTGGAGGACGGCGGGTTCGGCACACGG  
1501 GGTGTTCCCTGCTAAACAGCAATGCCATGGATGTGGTCCTGCAGCCGAGCCCTGCC  
1502 CTTAGCTGGAGGTGACAGGTGGGATCCTGGATGTCTACATCTTCCCTGGGCCAG  
1503 AGCCCAAGAGCGTGGTGCAGCAGTACCTGGACGTTGTGGGATAACCGTTCATGCC  
1504 GCCATACTGGGGCCTGGGCTTCCACCTGTGCCGCTGGGGCTACTCCTCCACCGCT  
1505 ATCACCCGCCAGGTGGTGGAGAACATGACCAGGGGCCACTTCCCCCTGGACGTC  
1506 CAGTGGAACGACCTGGACTACATGGACTCCCGGAGGGACTTCACGTTCAACAAGG  
1507 ATGGCTTCCGGGACTTCCCGGCCATGGTGCAGGAGCTGCACCAGGGCGGGCCGGC  
1508 GCTACATGATGATCGTGGATCCTGCCATCAGCAGCTCGGGCCCTGCCGGGAGCTA  
1509 CAGGCCCTACGACGAGGGTCTGCGGAGGGGGGTTTTTCATCACCAACGAGACCGG  
1510 CCAGCCGCTGATTGGGAAGGTATGGCCCGGGTCCACTGCCTTCCCCGACTTCACC  
1511 AACCCACAGCCCTGGCCTGGTGGGAGGACATGGTGGCTGAGTTCCATGACCAG  
1512 GTGCCCTTCGACGGCATGTGGATTGACATGAACGAGCCTTCCAACCTTCATCAGGG  
1513 GCTCTGAGGACGGCTGCCCAACAATGAGCTGGAGAACCCACCCTACGTGCCTG  
1514 GGGTGGTTGGGGGGACCCTCCAGGCGGCCACCATCTGTGCCTCCAGCCACCAGT  
1515 TTCTCTCCACACACTACAACCTGCACAACCTCTACGGCCTGACCGAAGCCATCGCC  
1516 TCCACAGGGCGCTGGTGAAGGCTCGGGGGACACGCCCATTTGTGATCTCCCGC  
1517 TCGACCTTTGCTGGCCACGGCCGATACGCCGGCCACTGGACGGGGGACGTGTGG  
1518 AGCTCCTGGGAGCAGCTCGCCTCCTCCGTGCCAGAAATCCTGCAGTTTAACCTGC  
1519 TGGGGGTGCCTCTGGTTCGGGGCCGACGTCTGCGGCTTCCCTGGGCAACACCTCAG  
1520 AGGAGCTGTGTGTGCGCTGGACCCAGCTGGGGGCCTTCTACCCCTTCATGCGGAA  
1521 CCACAACAGCCTGCTCAGTCTGCCCCAGGAGCCGTACAGCTTCAGCGAGCCGGC  
1522 CCAGCAGGCCATGAGGAAGGCCCTCACCTGCGCTACGCACTCCTCCCCACCT



1523 CTACACACTGTTCCACCAGGCCACGTCGCGGGGGAGACCGTGGCCCGGCCCT  
1524 CTTCTGGAGTTCCCAAGGACTCTAGCACCTGGACTGTGGACCACCAGCTCCTG  
1525 TGGGGGGAGGCCCTGCTCATACCCAGTGCTCCAGGCCGGAAGGCCGAAGTG  
1526 ACTGGCTACTTCCCCTTGGGCACATGGTACGACCTGCAGACGGTGCCAGTAGAGG  
1527 CCCTTGGCAGCCTCCCACCCACCTGCAGCTCCCCGTGAGCCAGCCATCCACAG  
1528 CGAGGGGCAGTGGGTGACGCTGCCGGCCCCCTGGACACCATCAACGTCCACCT  
1529 CCGGGCTGGGTACATCATCCCCCTGCAGGGCCCTGGCCTCACAACCACAGAGTC  
1530 CCGCCAGCAGCCCATGGCCCTGGCTGTGGCCCTGACCAAGGGTGGGGAGGCC  
1531 GAGGGGAGCTGTTCTGGGACGATGGAGAGAGCCTGGAAGTGCTGGAGCGAGGG  
1532 GCCTACACACAGGTCATCTTCTGGCCAGGAATAACACGATCGTGAATGAGCTGG  
1533 TACGTGTGACCAGTGAGGGAGCTGGCCTGCAGCTGCAGAAGGTGACTGTCCTGG  
1534 GCGTGGCCACGGCGCCCCAGCAGGTCCTCTCCAACGGTGTCCCTGTCTCCA  
1535 CACTACAGCCCCGACACCAAGGTCCTGGACATCTGTGTCTCGCTGTTGATGGGA  
1536 GAGCAGTTTCTCGTCAGCTGGTGT

1537

1538 **GAADup327/328**

1539 ATGGGAGTGAGGCACCCGCCCTGCTCCCACCGGCTCCTGGCCGTCTGCGCCCTC  
1540 GTGTCCTTGGCAACCGCTGCACTCCTGGGGCACATCCTACTCCATGATTTCTGCT  
1541 GGTTCCCCGAGAGCTGAGTGGCTCCTCCCCAGTCCTGGAGGAGACTCACCCAGCT  
1542 CACCAGCAGGGAGCCAGCAGACCAGGGCCCCGGGATGCCCAGGCACACCCCGG  
1543 CCGTCCCAGAGCAGTGCCACACAGTGCGACGTCCCCCCCAACAGCCGCTTCGA  
1544 TTGCGCCCCTGACAAGGCCATCACCCAGGAACAGTGCGAGGCCCGCGGCTGTTG  
1545 CTACATCCCTGCAAAGCAGGGGCTGCAGGGAGCCAGATGGGGCAGCCCTGGTG  
1546 CTTCTTCCCACCCAGCTACCCAGCTACAAGCTGGAGAACCCTGAGCTCCTCTGAAA  
1547 TGGGCTACACGGCCACCCTGACCCGTACCACCCACCTTCTTCCCCAAGGACAT  
1548 CCTGACCCTGCGGCTGGACGTGATGATGGAGACTGAGAACCGCCTCCACTTCACG  
1549 ATCAAAGATCCAGCTAACAGGCGCTACGAGGTGCCCTTGGAGACCCCGCATGTCC  
1550 ACAGCCGGGCACCGTCCCCACTCTACAGCGTGGAGTTCTCCGAGGAGCCCTTCG  
1551 GGGTGATCGTGCGCCGGCAGCTGGACGGCCGCGTGCTGCTGAACACGACGGTG  
1552 GCGCCCCTGTTCTTTGCGGACCAGTTCCTTCAGCTGTCCACCTCGCTGCCCTCGC  
1553 AGTATATCACAGGCCTCGCCGAGCACCTCAGTCCCCTGATGCTCAGCACCAGCTG  
1554 GACCAGGATCACCTGTGGAACCGGGACCTTGCGCCCACGCCCGGTGCGAACCT  
1555 CTACGGGTCTCACCTTTCTACCTGGCGCTGGAGGACGGCGGGTCGGCACACGG  
1556 GGTGTTCTGCTAAACAGCAATGCCATGGATGTGGTCCTGCAGCCGAGCCCTGCC  
1557 CTTAGCTGGAGGTCGACAGGTGGGATCCTGGATGTCTACATCTTCTGGGCCAG  
1558 AGCCCAAGAGCGTGGTGCAGCAGTACCTGGACGTTGTGGGATACCCGTTTCATGCC  
1559 GCCATACTGGGGCCTGGGCTTCCACCTGTGCCGCTGGGGCTACTCCTCCACCGCT  
1560 ATCACCCGCCAGGTGGTGGAGAACATGACCAGGGCCCACTTCCCCCTGGACGTC  
1561 CAGTGGAACGACCTGGACTACATGGACTCCCGGAGGGACTTCACGTTCAACAAGG  
1562 ATGGCTTCCGGGACTTCCCGGCCATGGTGCAGGAGCTGCACCAGGGCGGGCCGGC

1563 GCTACATGATGATCGTGGATCCTGCCATCAGCAGCTCGGGCCCTGCCGGGAGCTA  
1564 CAGGCCCTACGACGAGGGTCTGCGGAGGGGGGTTTTTCATCACCAACGAGACCGG  
1565 CCAGCCGCTGATTGGGAAGGTATGGCCCGGGTCCACTGCCTTCCCCGACTTCACC  
1566 AACCCACAGCCCTGGCCTGGTGGGAGGACATGGTGGCTGAGTTCCATGACCAG  
1567 GTGCCCTTCGACGGCATGTGGATTGACATGAACGAGCCTTCCAAC TTCATCAGGG  
1568 GCTCTGAGGACGGCTGCCCAACAATGAGCTGGAGAACCACCCCTACGTGCCTG  
1569 GGGTGGTTGGGGGGACCCTCCAGGCGGCCACCATCTGTGCCTCCAGCCACCAGT  
1570 TTCTCTCCACACACTACAACCTGCACAACCTCTACGGCCTGACCGAAGCCATCGCC  
1571 TCCACAGGGCGCTGGTGAAGGCTCGGGGGACACGCCCATTTGTGATCTCCCGC  
1572 TCGACCTTTGCTGGCCACGGCCGATACGCCGGCCACTGGACGGGGGACGTGTGG  
1573 AGCTCCTGGGAGCAGCTCGCCTCCTCCGTGCCAGAAATCCTGCAGTTTAACCTGC  
1574 TGGGGGTGCCTCTGGTCCGGGGCCGACGTCTGCGGCTTCCCTGGGCAACACCTCAG  
1575 AGGAGCTGTGTGTGCGCTGGACCCAGCTGGGGGCCTTCTACCCCTTCATGCGGAA  
1576 CCACAACAGCCTGCTCAGTCTGCCCCAGGAGCCGTACAGCTTCAGCGAGCCGGC  
1577 CCAGCAGGCCATGAGGAAGGCCCTCACCTGCGCTACGCACTCCTCCCCACCT  
1578 CTACACACTGTTCCACCAGGCCACGTCCGGGGGAGACCGTGGCCCGGCCCT  
1579 CTTCTGGAGTTCCCCAAGGACTCTAGCACCTGGACTGTGGACCACCAGCTCCTG  
1580 TGGGGGGAGGCCCTGCTCATCACCCAGTGCTCCAGGCCGGAAGGCCGAAGTG  
1581 ACTGGCTACTTCCCCTTGGGCACATGGTACGACCTGCAGACGGTGCCAGTAGAGG  
1582 CCCTTGGCAGCCTCCCACCCCCACCTGCAGCTCCCCGTGAGCCAGCCATCCACAG  
1583 CGAGGGGCAGTGGGTGACGCTGCCGGCCCCCTGGACACCATCAACGTCCACCT  
1584 CCGGGCTGGGTACATCATCCCCCTGCAGGGCCCTGGCCTCACAACCACAGAGTC  
1585 CCGCCAGCAGCCCATGGCCCTGGCTGTGGCCCTGACCAAGGGTGGGGAGGCC  
1586 GAGGGGAGCTGTTCTGGGACGATGGAGAGAGCCTGGAAGTGCTGGAGCGAGGG  
1587 GCCTACACACAGGTCATCTTCTGGCCAGGAATAACACGATCGTGAATGAGCTGG  
1588 TACGTGTGACCAGTGAGGGAGCTGGCCTGCAGCTGCAGAAGGTGACTGCAGAAG  
1589 GTGACTGTCCTGGGCGTGGCCACGGCGCCCCAGCAGGTCCTCTCCAACGGTGTC  
1590 CCTGTCTCCAACCTCACCTACAGCCCCGACACCAAGGTCCTGGACATCTGTGTCTC  
1591 GCTGTTGATGGGAGAGCAGTTTCTCGTCAGCTGGTGT

1592

1593

1594 **GLB1wt**

1595 ATGCCGGGGTTCTGTTTCGCATCCTCCCTCTGTTGCTGGTTCTGCTGCTTCTGG  
1596 GCCCTACGCGCGGCTTGCGCAATGCCACCCAGAGGATGTTTCAAATTGACTATAG  
1597 CCGGGACTCCTTCTCAAGGATGGCCAGCCATTTTCGCTACATCTCAGGAAGCATTC  
1598 ACTACTCCCGTGTGCCCCGCTTCTACTGGAAGGACCGGCTGCTGAAGATGAAGAT  
1599 GGCTGGGCTGAACGCCATCCAGACGTATGTGCCCTGGAAC TTTTCATGAGCCCTGG  
1600 CCAGGACAGTACCAGTTTTCTGAGGACCATGATGTGGAATATTTTCTTCGGCTGGC  
1601 TCATGAGCTGGGACTGCTGGTTATCCTGAGGCCCGGGCCCTACATCTGTGCAGAG  
1602 TGGGAAATGGGAGGATTACCTGCTTGGCTGCTAGAGAAAGAGTCTATTCTTCTCCG

1603 CTCCTCCGACCCAGATTACCTGGCAGCTGTGGACAAGTGGTTGGGAGTCCTTCTG  
1604 CCCAAGATGAAGCCTCTCCTCTATCAGAATGGAGGGCCAGTTATAACAGTGCAGG  
1605 TTGAAAATGAATATGGCAGCTACTTTGCCTGTGATTTTGACTACCTGCGCTTCCTGC  
1606 AGAAGCGCTTTCGCCACCATCTGGGGGATGATGTGGTTCTGTTTACCACTGATGGA  
1607 GCACATAAAACATTCTGAAATGTGGGGCCCTGCAGGGCCTCTACACCACGGTGG  
1608 ACTTTGGAACAGGCAGCAACATCACAGATGCTTTCCTAAGCCAGAGGAAGTGTGA  
1609 GCCCAAAGGACCCTTGATCAATTCTGAATTCTATACTGGCTGGCTAGATCACTGGG  
1610 GCCAACCTCACTCCACAATCAAGACCGAAGCAGTGGCTTCCTCCCTCTATGATATA  
1611 CTTGCCCGTGGGGCGAGTGTGAACTTGTACATGTTTATAGGTGGGACCAATTTTGC  
1612 CTATTGGAATGGGGCCAACTCACCTATGCAGCACAGCCCACCAGCTACGACTAT  
1613 GATGCCCCACTGAGTGAGGCTGGGGACCTCACTGAGAAGTATTTTGTCTCTGCGAA  
1614 ACATCATCCAGAAGTTTGAAAAAGTACCAGAAGGTCCTATCCCTCCATCTACACCA  
1615 AAGTTTGCATATGGAAAGGTCACCTTTGGAAAAGTTAAAGACAGTGGGAGCAGCTCT  
1616 GGACATTCTGTGTCCCTCTGGGCCCATCAAAGCCTTTATCCCTTGACATTTATCCA  
1617 GGTGAAACAGCATTATGGGTTTGTGCTGTACCGGACAACACTTCCTCAAGATTGCA  
1618 GCAACCCAGCACCTCTCTCTTACCCCTCAATGGAGTCCACGATCGAGCATATGTT  
1619 GCTGTGGATGGGATCCCCCAGGGAGTCCTTGAGCGAAACAATGTGATCACTCTGA  
1620 ACATAACAGGGAAAGCTGGAGCCACTCTGGACCTTCTGGTAGAGAACATGGGACG  
1621 TGTGAACTATGGTGCATATATCAACGATTTTAAGGGTTTGGTTTCTAACCTGACTCT  
1622 CAGTTCCAATATCCTCACGGACTGGACGATCTTTCCTACTGGACACTGAGGATGCAG  
1623 TGTGCAGCCACCTGGGGGGCTGGGGACACCGTGACAGTGGCCACCATGATGAAG  
1624 CCTGGGCCCACTCACTCACTACACGCTCCCGGCCTTTTATATGGGGAACTTC  
1625 TCCATTCCCAGTGGGATCCAGACTTGCCCCAGGACACCTTTATCCAGTTTCCTGG  
1626 ATGGACCAAGGGCCAGGTCTGGATTAATGGCTTTAACCTTGGCCGCTATTGGCCA  
1627 GCCCGGGGCCCTCAGTTGACCTTGTTTGTGCCCCAGCACATCCTGATGACCTCGG  
1628 CCCCAAACACCATCACCGTGCTGGAAGTGGAGTGGGCACCCTGCAGCAGTGATGA  
1629 TCCAGAACTATGTGCTGTGACGTTTCGTGGACAGGCCAGTTATTGGCTCATCTGTGA  
1630 CCTACGATCATCCCTCCAAACCTGTTGAAAAAAGACTCATGCCCCCACCCTCGCAA  
1631 AAAAACAAGATTCATGGCTGGACCATGTA  
1632  
1633

1634 **GLB1Dup84**

1635 ATGCCGGGGTTCCTGGTTCGCATCCTCCCTCTGTTGCTGGTTCTGCTGCTTCTGG  
1636 GCCCTACGCGCGGCTTGGCGCAATGCCACCCAGAGGATGTTTCAAATTGACTATAG  
1637 CCGGGACTCCTTCTCAAGGATGGCCAGCCATTTGCTACATCTCAGGAAGCATTG  
1638 ACTACTCCCGTGTGCCCCGCTTCTACTGGAAGGACCGGCTGCTGAAGATGAAGAT  
1639 GGCTGGGCTGAACGCCATCCAGACGTATGTGCCCTGGAACCTTCATGAGCCCTGG  
1640 CCAGGACAGTACCAGTTTTCTGAGGACCATGATGTGGAATATTTTCTTCGGCTGGC  
1641 TCATGAGCTGGGACTGCTGGTTATCCTGAGGCCCGGGCCCTACATCTGTGCAGAG  
1642 TGGGAAATGGGAGGATTACCTGCTTGGCTGCTAGAGAAAGAGTCTATTCTTCTCCG  
1643 CTCCTCCGACCCAGATTACCTGGCAGCTGTGGACAAGTGGTTGGGAGTCCTTCTG  
1644 CCCAAGATGAAGCCTCTCCTCTATCAGAATGGAGGGCCAGTTATAACAGTGCAGG  
1645 TTGAAAATGAATATGGCAGCTACTTTGCCTGTGATTTTGACTACCTGCGCTTCTGC  
1646 AGAAGCGCTTTCGCCACCATCTGGGGGATGATGTGGTTCTGTTTACCACTGATGGA  
1647 GCACATAAAACATTCTGAAATGTGGGGCCCTGCAGGGCCTCTACACCACGGTGG  
1648 ACTTTGGAACAGGCAGCAACATCACAGATGCTTTCCTAAGCCAGAGGAAGTGTGA  
1649 GCCCAAAGGACCCTTGATCAATTCTGAATTCTATACTGGCTGGCTAGATCACTGGG  
1650 GCCAACCTCACTCCACAATCAAGACCGAAGCAGTGGCTTCTCCTCTATGATATA  
1651 CTTGCCCGTGGGGCGAGTGTGAACTTGTACATGTTTATAGGTGGGACCAATTTTGC  
1652 CTATTGGAATGGGGCCAACTCACCTATGCAGCACAGCCCACCAGCTACGACTAT  
1653 GATGCCCCACTGAGTGAGGCTGGGGACCTCACTGAGAAGTATTTTCTCTGCGAA  
1654 ACATCATCCAGAAGTTTAAAAAGTACCAGAAGGTCCTATCCCTCCATCTACACCA  
1655 AAGTTTGCATATGGAAAGGTCACCTTTGGAAAAGTTAAAGACAGTGGGAGCAGCTCT  
1656 GGACATTCTGTGTCCCTCTGGGCCCATCAAAGCCTTTATCCCTTGACATTTATCCA  
1657 GGTGAAACAGCATTATGGGTTTGTGCTGTACCGGACAACACTTCTCAAGATTGCA  
1658 GCAACCCAGCACCTCTCTTTCACCCCTCAATGGAGTCCACGATCGAGCATATGTT  
1659 GCTGTGGATGGGATCCCCAGGGAGTCCCTTGAGCGAAACAATGTGATCACTCTGA  
1660 ACATAACAGGGAAAGCTGGAGCCACTCTGGACCTTCTGGTAGAGAACATGGGACG  
1661 TGTGAACTATGGTGCATATATGGTGCATATATCAACGATTTTAAAGGGTTTGGTTTCT  
1662 AACCTGACTCTCAGTTCCAATATCCTCACGGACTGGACGATCTTTCCTACTGGACAC  
1663 TGAGGATGCAGTGTGCAGCCACCTGGGGGGCTGGGGACACCGTGACAGTGGCCA  
1664 CCATGATGAAGCCTGGGCCCAACTCATCCAACTACACGCTCCCGGCCTTTTATA  
1665 TGGGGAACCTTCTCCATTCCAGTGGGATCCCAGACTTGCCCCAGGACACCTTTATC  
1666 CAGTTTCTGGATGGACCAAGGGCCAGGTCTGGATTAATGGCTTTAACCTTGGCC  
1667 GCTATTGGCCAGCCCGGGGCCCTCAGTTGACCTTGTGTTGTGCCCCAGCACATCCT  
1668 GATGACCTCGGCCCAACACCATCACCGTGCTGGAAGTGGAGTGGGCACCCTG  
1669 CAGCAGTGATGATCCAGAACTATGTGCTGTGACGTTTCGTGGACAGGCCAGTTATT  
1670 GGCTCATCTGTGACCTACGATCATCCCTCCAAACCTGTTGAAAAAAGACTCATGCC  
1671 CCCACCCCGCAAAAAACAAAGATTCATGGCTGGACCATGTA

1672

1673

1674 **PORCNwt**

1675 ATGGCCACCTTTAGCCGCCAGGAATTTTTCCAGCAGCTACTGCAAGGCTGTCTCCT  
1676 GCCTACTGCCCAGCAGGGCCTTGACCAGATCTGGCTGCTCCTTGCCATCTGCCTC  
1677 GCCTGCCGCTCCTCTGGAGGCTCGGGTTGCCATCCTACCTGAAGCATGCAAGCA  
1678 CCGTGGCAGGCGGGTTCTTCAGCCTCTACCACTTCTTCCAGCTGCACATGGTTTG  
1679 GGTCGTGCTGCTCAGCCTCCTGTGCTACCTCGTGCTGTTCCCTCTGCCGACATTCC  
1680 CCCATCGAGGCGTCTTCCTATCCGTCACCATCCTCATCTACCTACTCATGGGTGAG  
1681 ATGCACATGGTAGACACCGTGACATGGCACAAGATGCGAGGGGCACAGATGATTG  
1682 TGGCCATGAAGGCAGTGTCTCTGGGCTTCGACCTGGACCGGGGCGAGGTGGGTA  
1683 CGGTGCCCTCGCCAGTGGAGTTCATGGGCTACCTCTACTTCGTGGGCACCATCGT  
1684 CTTGGGCCCTGGATATCCTTCCACAGCTACCTACAAGCTGTCCAAGGCCGCCCA  
1685 CTGAGCTGCCGGTGGCTGCAGAAGGTGGCCCGGAGCCTGGCACTGGCCCTGCTG  
1686 TGCCTTGTGCTGTCCACTTGCGTGGGCCCTACCTCTTCCCGTACTTCATCCCCCT  
1687 CAACGGTGACCGCCTCCTTCGCAAGGGCACCATGGTAAGGTGGCTGCGAGCCTA  
1688 CGAGAGTGCTGTCTCCTTCCACTTCAGCAACTATTTTGTGGGCTTTCTTTCCGAGG  
1689 CCACGGCCACGTTGGCGGGGGCTGGCTTTACCGAGGAGAAGGATCACCTGGAAT  
1690 GGGACCTGACGGTGTCCAAGCCACTGAATGTGGAGCTGCCTCGGTCAATGGTGG  
1691 AAGTTGTCACAAGCTGGAACCTGCCCATGTCTTATTGGCTAAATAACTATGTTTTCA  
1692 AGAATGCTCTCCGCCTGGGGACCTTCTCGGCTGTGCTGGTCACCTATGCAGCCAG  
1693 CGCCCTCCTACATGGCTTCAGTTTCCACCTGGCTGCGGTCCTGCTGTCCCTGGCT  
1694 TTTATCACTTACGTGGAGCATGTCCTCCGGAAGCGCCTGGCTCGGATCCTCAGTG  
1695 CCTGTGTCTTGTCAAAGCGGTGCCCGCCAGACTGTTCCGACCAGCATCGCTTGGG  
1696 CCTGGGGGTGCGAGCCTTAAACTTGCTCTTTGGAGCTCTGGCCATCTTCCACCTG  
1697 GCCTACCTGGGCTCCCTGTTTGATGTCGATGTGGATGACACCACAGAGGAGCAGG  
1698 GCTACGGCATGGCATACTGTCCACAAGTGGTCAGAGCTCAGCTGGGCCAGTCA  
1699 CTGGGTCACTTTTGGATGCTGGATCTTCTACCGTCTCATAGGC

1700

1701 **PORCNDup20**

1702 ATGGCCACCTTTAGCCGCCAGGAATTTTTCCAGCAGCTACTGCAAGGCTGTCTCCT  
1703 GCCTACTGCCCAGCAGGGCCTTGACCAGATCTGGCTGCTCCTTGCCATCTGCCTC  
1704 GCCTGCCGCTCCTCTGGAGGCTCGGGTTGCCATCCTACCTGAAGCATGCAAGCA  
1705 CCGTGGCAGGCGGGTTCTTCAGCCTCTACCACTTCTTCCAGCTGCACATGGTTTG  
1706 GGTCGTGCTGCTCAGCCTCCTGTGCTACCTCGTGCTGTTCCCTCTGCCGACATTCC  
1707 CCCATCGAGGCGTCTTCCTATCCGTCACCATCCTCATCTACCTACTCATGGGTGAG  
1708 ATGCACATGGTAGACACCGTGACATGGCACAAGATGCGAGGGGCACAGATGATTG  
1709 TGGCCATGAAGGCAGTGTCTCTGGGCTTCGACCTGGACCGGGGCGAGGTGGGTA  
1710 CGGTGCCCTCGCCAGTGGAGTTCATGGGCTACCTCTACTTCGTGGGCACCATCGT  
1711 CTTGGGCCCTGGATATCCTTCCACAGCTACCTACAAGCTGTCCAAGGCCGCCCA  
1712 CTGAGCTGCCGGTGGCTGCAGAAGGTGGCCCGGAGCCTGGCACTGGCCCTGCTG  
1713 TGCCTTGTGCTGTCCACTTGCGTGGGCCCTACCTCTTCCCGTACTTCATCCCCCT

1714 CAACGGTGACCGCCTCCTTCGCAAGGGCACCATGGTAAGGTGGCTGCGAGCCTA  
1715 CGAGAGTGCTGTCTCCTTCCACTTCAGCAACTATTTTGTGGGCTTTCTTTCCGAGG  
1716 CCACGGCCACGTTGGCGGGGGCTGGCTTTACCGAGGAGAAGGATCACCTGGAAT  
1717 GGGACCTGACGGTGTCCAAGCCACTGAATGTGGAGCTGCCTCGGTCAATGGTGG  
1718 AAGTTGTCACAAGCTGGAACCTGCCCATGTCTTATTGGCTAAATAACTATGTTTTCA  
1719 AGAATGCTCTCCGCCTGGGGACCTTCTCGGCTGTGCTGGTCACCTATGCAGCCAG  
1720 CGCCCTCCTACATGGCTTCAGTTTCCACCTGGCTGCGGTCCTGCTGTCCCTGGCT  
1721 TTTATCCCTGGCTTTTATCACTTACGTGGAGCATGTCCTCCGGAAGCGCCTGGCTC  
1722 GGATCCTCAGTGCCTGTGTCTTGTCAAAGCGGTGCCCGCCAGACTGTTTCGCACCA  
1723 GCATCGCTTGGGCCTGGGGGTGCGAGCCTTAAACTTGCTCTTTGGAGCTCTGGCC  
1724 ATCTTCCACCTGGCCTACCTGGGCTCCCTGTTTGTATGTCGATGTGGATGACACCAC  
1725 AGAGGAGCAGGGCTACGGCATGGCATACTGTCCACAAGTGGTCAGAGCTCAG  
1726 CTGGGCCAGTCACTGGGTCACTTTTGGATGCTGGATCTTCTACCGTCTCATAGGC  
1727

1728 **References**

- 1729 1. Ceccaldi, R., Rondinelli, B. & D'Andrea, A. D. Repair Pathway Choices and Consequences at  
1730 the Double-Strand Break. *Spec. Issue Qual. Control* **26**, 52–64 (2016).
- 1731 2. DiCarlo, J. E., Chavez, A., Dietz, S. L., Esvelt, K. M. & Church, G. M. Safeguarding  
1732 CRISPR-Cas9 gene drives in yeast. *Nat. Biotechnol.* **33**, 1250 (2015).
- 1733 3. McVey, M. & Lee, S. E. MMEJ repair of double-strand breaks (director's cut): deleted  
1734 sequences and alternative endings. *Trends Genet.* **24**, 529–538 (2008).
- 1735 4. Yu, A. M. & McVey, M. Synthesis-dependent microhomology-mediated end joining accounts  
1736 for multiple types of repair junctions. *Nucleic Acids Res.* **38**, 5706–5717 (2010).
- 1737 5. Davis, A. J. & Chen, D. J. DNA double strand break repair via non-homologous end-joining.  
1738 *Transl. Cancer Res.* **2**, 130–143 (2013).
- 1739 6. Heidenreich, E., Novotny, R., Kneidinger, B., Holzmann, V. & Wintersberger, U. Non-  
1740 homologous end joining as an important mutagenic process in cell cycle-arrested cells. *EMBO*  
1741 *J.* **22**, 2274 (2003).
- 1742 7. Pfeiffer, P., Goedecke, W. & Obe, G. Mechanisms of DNA double-strand break repair and  
1743 their potential to induce chromosomal aberrations. *Mutagenesis* **15**, 289–302 (2000).
- 1744 8. Brown, J. S. *et al.* Neddylation Promotes Ubiquitylation and Release of Ku from DNA-  
1745 Damage Sites. *Cell Rep.* **11**, 704–714 (2015).
- 1746 9. Landrum, M. J. *et al.* ClinVar: Public archive of interpretations of clinically relevant variants.  
1747 *Nucleic Acids Res.* **44**, D862–D868 (2016).
- 1748 10. Stenson, P. D. *et al.* Human Gene Mutation Database: towards a comprehensive central  
1749 mutation database. *J. Med. Genet.* **45**, 124 (2008).

1750  
1751  
1752
